# Supplementary material
Source: PubMed Central journal article supplement (PMC9764343)
Supplement: mmc1.pdf [file mmc1.pdf]

# THE LANCET HIV

## Supplementary appendix

This appendix formed part of the original submission and has been peer reviewed. We post it as supplied by the authors.

Supplement to: Mitchell KM, Dimitrov D, Silhol R, et al. The potential effect of COVID-19-related disruptions on HIV incidence and HIV-related mortality among men who have sex with men in the USA: a modelling study. *Lancet HIV* 2021; published online Feb 19. [http://dx.doi.org/10.1016/S2352-3018\(21\)00022-9](http://dx.doi.org/10.1016/S2352-3018(21)00022-9).

# Supplementary Information

## The potential effect of COVID-19-related disruptions on HIV incidence and HIV-related mortality among men who have sex with men in the USA: a modelling study

Kate M Mitchell, Dobromir Dimitrov, Romain Silhol, Lily Geidelberg, Mia Moore, Albert Liu, Chris Beyrer, Kenneth H Mayer, Stefan Baral, Marie-Claude Boily.

### Contents

|                                                           |    |
|-----------------------------------------------------------|----|
| Supplementary Methods .....                               | 2  |
| Model description .....                                   | 2  |
| Model equations.....                                      | 7  |
| Disability-adjusted life years (DALYs) .....              | 11 |
| Model calibration details.....                            | 12 |
| Data sources – model parameters and fitting outcomes..... | 12 |
| Mixing parameters .....                                   | 12 |
| Parameter ranges.....                                     | 12 |
| Calibrating the model to PrEP coverage .....              | 12 |
| Modelling COVID-19-related disruptions .....              | 13 |
| Tables – Parameters and Fitting Data .....                | 14 |
| Model Fits to Data .....                                  | 23 |
| Table - Disruptions .....                                 | 26 |
| Supplementary Results.....                                | 27 |
| References.....                                           | 39 |

## Supplementary Methods

This description of the methods is adapted from Mitchell et al 2019<sup>1</sup>. The model presented here differs from that presented in Mitchell et al 2019 in also including compartments for MSM on PrEP. Treatment compartments are renumbered here to allow for this inclusion. A brief description of how the model was calibrated to PrEP coverage has been added here, and parameters relating to PrEP efficacy, uptake, adherence and dropout have been added to Table S1 (p14-20). Data used to calibrate the model to PrEP coverage have been added to Table S2 (p21-22), and the model calibration to PrEP coverage has been added to Figure S4 (p23-25).

### Model description

In the model equations and schematics, uninfected MSM are denoted by  $X_{v,w}^z$ , those with acute HIV infection by  $A_{v,w}^z$  and chronic HIV infection by  $Y_{v,w}^{x,y,z}$ . Subscripts refer to the following states:  $v$  is age group (0 = 18-24 years old; 1 = >24 years old),  $w$  is race (0 = black; 1 = white). The younger age group had a lower age limit of 18 to match the minimum age of MSM included in NHBS surveys, which supplied the behavioural parameters and HIV prevalence estimates used in this analysis. Superscripts refer to the following states:  $x$  is CD4 count (current CD4 count for those not taking or not adherent to ART, CD4 count at ART initiation for those taking and adherent to ART; 0 = acute, 1 = CD4 >500, 2 = CD4 350-500, 3 = CD4 200-350, 4 = CD4 <200 cells per  $\mu\text{L}$ ),  $y$  is set-point viral load (SPVL; 0 = acute, 1 =  $\text{Log}_{10}$  SPVL <4.0, 2 =  $\text{Log}_{10}$  SPVL 4.0-4.5, 3 =  $\text{Log}_{10}$  SPVL 4.5-5.0, 4 =  $\text{Log}_{10}$  SPVL >5.0),  $z$  is care state (0 = never testing, 1 = testing but not diagnosed, 2 = on PrEP, 3 = diagnosed not linked to care, 4 = linked into HIV care, 5 = on ART, adherent and partially suppressed, 6 = in first year on ART, adherent and fully suppressed, 7 = 2<sup>nd</sup> year on ART adherent and fully suppressed, 8 = 3<sup>rd</sup> and subsequent years on ART adherent and fully suppressed, 9 = on ART but non-adherent and not suppressed, 10 = stopped taking ART (due to dropout or failure)). For those uninfected with HIV, the only possible care states are  $z=0, 1$  or 2. Those with acute infection may be in one of care states  $z=0-5$ ; after achieving full viral suppression on ART they are assumed to no longer be in the acute stage.

Fig S1 shows the age and race groups, with movement and sexual mixing between them. Of individuals entering the sexually active Baltimore MSM population, a proportion  $m_{v,w}$  are assumed to be in each combination of age and race group ( $m_{v,w}$  is calculated from  $m_{black}$ , the proportion of incoming MSM who are black, and  $m_{young,w}$ , the proportion of incoming MSM of each race who are aged 18-24 years old). Those in the 18-24 year old group move into the older age group at an annual rate  $\pi_w$  per year, corresponding to an average of  $1/\pi_w$  years that sexually active MSM in race group  $w$  spend in the 18-24 year old age group.

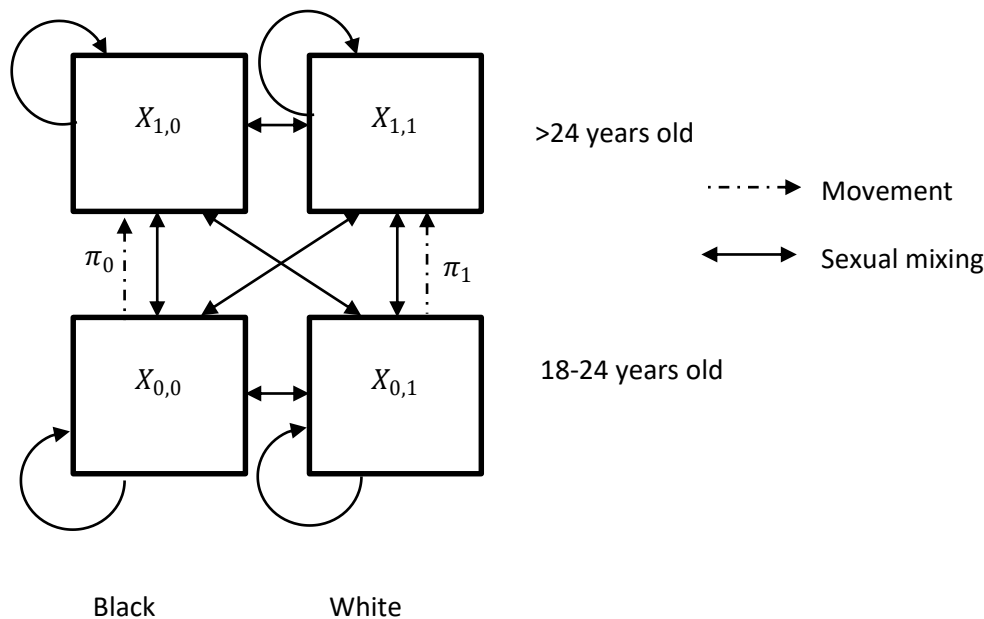

**Fig S1: Age groups, race groups, movement and mixing in the model**

Fig S2 shows the transitions between different stages of HIV infection for those not currently taking ART, by current HIV stage and SPVL. These transitions are the same for all age, race and care states (apart from those on ART and adherent), with the following exceptions: infection rates ( $\lambda$ ) and background death rate ( $\mu$ ) differ by age and race, and infection rates ( $\lambda$ ) also differ by PrEP status.

Susceptible individuals ( $X^z$ ) become infected with HIV at a rate  $\lambda_{v,w,z}$  and move into the acutely infected compartment ( $A^z$ ). After a period ( $1/\gamma_a$  years) in the acute stage, individuals move into one of 16 compartments ( $Y^{x,y,z}$ ), defined by their SPVL and initial CD4 count after acute infection. A proportion ( $\theta_y$ ) of those leaving the acute stage move into SPVL stratum  $y$ . For each SPVL stratum, a proportion  $f_{x,y}$  of those entering SPVL stratum  $y$  are initially in CD4 compartment  $Y^{x,y,z}$ . Within each SPVL stratum, HIV-positive people pass sequentially through progressively lower CD4 count categories. The rate of moving from one CD4 compartment to the next is given by  $\gamma_{x,y}$ .

There is a constant background per-capita rate of non-HIV related death ( $\mu_{v,w}$ ) from every compartment (susceptibles and all infected compartments), and an additional rate of HIV-related death from each infected compartment ( $\alpha_{x,y,z}$ ), which varies by SPVL and current CD4 count, but takes the same value for all those off ART or non-adherent to ART ( $z = 0,1,2,3,4,9,10$ ).

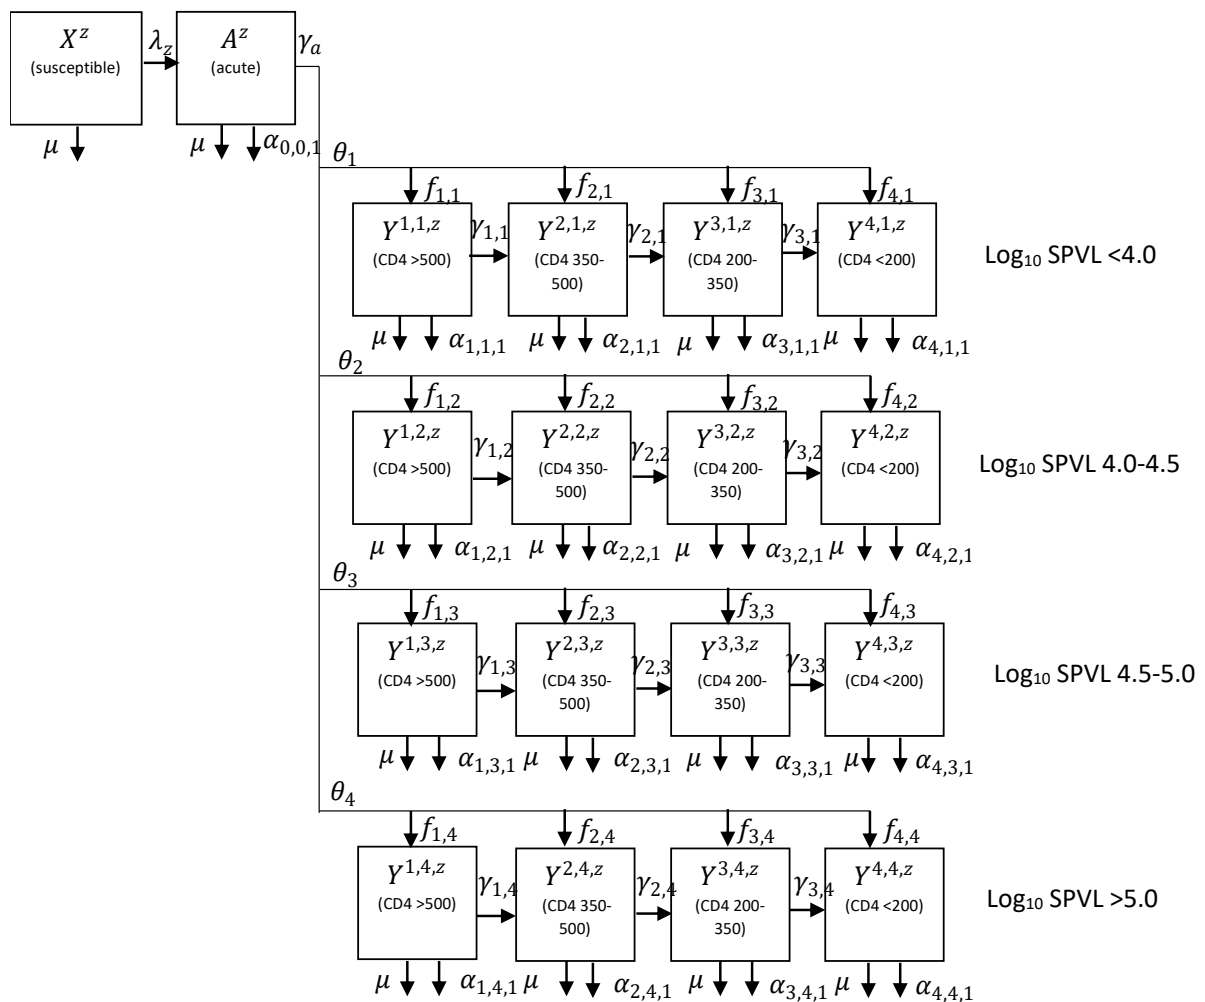

**Fig S2. HIV disease progression, by HIV states and SPVL, for those not on ART, and for those on ART but not adherent.** Superscripts on states and subscripts on HIV-related death rates are  $x,y,z$  ( $x$  = CD4 category;  $y$  = set-point viral load category;  $z$  = care state); subscripts for age and race are omitted for clarity.

Transitions between the different stages of care are shown in Fig S3. New men join the sexually active MSM population (through ageing into the population, sexual debut or immigration), at a rate  $\Gamma$  and are assumed to all be uninfected with HIV initially. A proportion  $p$  of new entrants are assumed to never routinely test for HIV and do not seek treatment until they become symptomatic (develop AIDS-defining illness); they enter the compartment for never-testing susceptibles ( $X^0$ ). The remainder of new entrants enter compartment  $X^1$ , who are susceptibles who may undergo HIV testing. Susceptibles in either state may become infected at a rate  $\lambda_1$ . Susceptibles who may undergo testing can start PrEP at a per-capita rate  $\delta\tau_{v,w,1}$ , where  $\tau_{v,w,1}$  is the age- and race-varying rate at which they test for HIV, and  $\delta$  is the proportion of negative tests following which PrEP is offered and accepted. Those taking PrEP may drop out of PrEP at an age- and race-varying rate  $\iota_{v,w}$ , and return to the testing susceptible compartment ( $X^1$ ).

Those never testing who become infected enter the infected compartments of never testers ( $A^0/Y^{x,y,0}$ , for acute/chronic infection, respectively). Those who may test enter the infected compartments of those undiagnosed but who may undergo HIV testing ( $A^1/Y^{x,y,1}$ ). Those on PrEP enter the infected on-PrEP compartments ( $A^2/Y^{x,y,2}$ ). Those on PrEP may drop out of PrEP at a rate  $\iota$ , moving to the equivalent disease stage for those who may test ( $A^1/Y^{x,y,1}$ ). Those who may test and those on PrEP undergo HIV testing at a per-capita rate  $\tau_{v,w,z}$  – those on PrEP test at a higher rate,  $\tau_2$ , than those not on PrEP ( $\tau_1$ ), and testing rates for those not on PrEP vary with age and race. A proportion  $q$  of those testing are rapidly linked into care and move into the ‘in care’ compartments  $A^4/Y^{x,y,4}$ , the remainder  $(1-q)$  move into the ‘diagnosed not linked into care’ compartment ( $A^3/Y^{x,y,3}$ ). Those who are diagnosed but not in care can be linked into care, moving into compartments  $A^4/Y^{x,y,4}$  at a rate  $\epsilon_{v,w}$ , and those linked into care may drop out from pre-ART care and go into the ‘diagnosed not linked into care’ compartment ( $A^3/Y^{x,y,3}$ ) at a rate  $\omega_w\phi_5$  ( $\phi_5$  is the rate of dropout from ART in the first year of treatment,  $\omega_w$  is the race-specific ratio of dropout from care relative to rate of dropout from ART). Those linked into care may begin ART, at a rate related to their CD4 count,  $\xi_x$ , with a proportion ( $\chi$ ) who are adherent to their treatment moving into the first ART compartment,  $A^5/Y^{x,y,6}$ , and those who are non-adherent  $(1-\chi)$  moving into compartment,  $Y^{x,y,9}$ . People at any other stage of the care continuum may also begin ART due to becoming symptomatic and seeking medical care, at a rate  $\psi_{x,z}$ , which is based upon CD4-count specific rates of incidence of AIDS-defining illness, and whether or not they have previously taken ART, and also move into the first ART compartment if they are adherent (proportion  $\chi$ ), or the “on ART but not adherent” compartment ( $Y^{x,y,9}$ ) if they are not adherent. Those in the non-adherent ART compartment are assumed to be fully infectious and have no survival benefit from ART, and progress in the same way as those not on ART.

People in the first ART compartment,  $A^5/Y^{x,y,6}$ , are assumed to be partially virally suppressed, and they leave this compartment at a rate  $\sigma_y$ , where  $1/\sigma_y$  is the average duration from ART initiation to achieving viral suppression.  $\sigma_y$  varies by SPVL, but not by initial CD4 count [1]. They move into the first fully virally suppressed compartment ( $Y^{x,y,6}$ ), where they stay for the remainder of their first year on ART, and move into the next ART compartment (2<sup>nd</sup> year;  $Y^{x,y,7}$ ) at a rate  $\eta_y$ , where  $1/\eta_y$  (the average duration spent in the first year compartment) is estimated as  $1 - 1/\sigma_y$ . People move from the 2<sup>nd</sup> year on ART compartment ( $Y^{x,y,7}$ ) into the >2 years on ART compartment ( $Y^{x,y,8}$ ) at a rate 1/year. The final fully suppressed compartment ( $Y^{x,y,8}$ ) contains those who have remained on ART for more than 2 years and are still virally suppressed. For those on ART, the additional rate of HIV-related death from each of these compartments ( $\alpha_{x,y,z}$ ) varies by CD4 count at ART initiation and duration on ART.

Those in any of the ART compartments may drop out of treatment at a rate  $\phi_z$ , which varies with time since initiation of ART. Dropouts from ART go initially into the dropout compartments,  $Y^{x,y,10}$ , where they progress through different CD4 compartments in the same way as those never on ART. Those dropping out of the adherent ART compartments ( $A^5, Y^{x,y,6} - Y^{x,y,8}$ ), move into the same CD4 compartment as the one they were in when they started ART, those dropping out of the non-adherent ART compartment ( $Y^{x,y,9}$ ) retain the CD4 count they had at the point of dropout. People remain in the same SPVL category after dropping out of ART. ART dropouts may re-initiate treatment due to developing AIDS symptoms and seeking medical care, at a rate  $\psi_{x,10}$ , or may re-enrol in HIV care, at a rate  $\zeta$ . Those re-entering care are not distinguished from those entering care for the first time. Likewise, those re-initiating treatment progress in the same way as those beginning ART for the first time, and are not distinguished from them.

We do not explicitly model individuals on ART gaining and losing viral suppression over time, due to a lack of data, but we do capture overall levels of viral suppression as well as dynamic (re-)entry and dropout from care and treatment.

The model was expressed as a set of differential equations which were solved numerically using a variable-stepsize eighth-order Runge-Kutta method <sup>2</sup>.



## Model equations

*MSM who never get tested for HIV:*

$$\frac{d}{dt}(X_{v,w}^0) = \Gamma p m_{v,w} + v \pi_w X_{1-v,w}^0 - X_{v,w}^0 (\lambda_{v,w,1} + \mu_{v,w} + (1-v)\pi_w)$$

$$\frac{d}{dt}(A_{v,w}^0) = \lambda_{v,w,1} X_{v,w}^0 + v \pi_w A_{1-v,w}^0 - A_{v,w}^0 (\gamma_a + \mu_{v,w} + \alpha_{0,0,0} + (1-v)\pi_w + \psi_{0,0})$$

$$\frac{d}{dt}(Y_{v,w}^{1,y,0}) = \gamma_a \theta_y f_{1,y} A_{v,w}^0 + v \pi_w Y_{1-v,w}^{1,y,0} - Y_{v,w}^{1,y,0} (\gamma_{1,y} + \mu_{v,w} + \alpha_{1,y,0} + (1-v)\pi_w + \psi_{1,0})$$

$$\frac{d}{dt}(Y_{v,w}^{x,y,0}) = \gamma_a \theta_y f_{x,y} A_{v,w}^0 + \gamma_{x-1,y} Y_{v,w}^{x-1,y,0} + v \pi_w Y_{1-v,w}^{x,y,0} - Y_{v,w}^{x,y,0} (\gamma_{x,y} + \mu_{v,w} + \alpha_{x,y,0} + (1-v)\pi_w + \psi_{x,0}); x \in \{2,3\}$$

$$\frac{d}{dt}(Y_{v,w}^{4,y,0}) = \gamma_a \theta_y f_{4,y} A_{v,w}^0 + \gamma_{3,y} Y_{v,w}^{3,y,0} + v \pi_w Y_{1-v,w}^{4,y,0} - Y_{v,w}^{4,y,0} (\mu_{v,w} + \alpha_{4,y,0} + (1-v)\pi_w + \psi_{4,0})$$

*MSM who may get tested, not diagnosed:*

$$\frac{d}{dt}(X_{v,w}^1) = \Gamma(1-p)m_{v,w} + v \pi_w X_{1-v,w}^1 + \iota_{v,w} X_{v,w}^2 - X_{v,w}^1 (\lambda_{v,w,1} + \mu_{v,w} + (1-v)\pi_w + \delta \tau_{v,w,1})$$

$$\frac{d}{dt}(A_{v,w}^1) = \lambda_{v,w,1} X_{v,w}^1 + v \pi_w A_{1-v,w}^1 + \iota_{v,w} A_{v,w}^2 - A_{v,w}^1 (\gamma_a + \mu_{v,w} + \alpha_{0,0,1} + (1-v)\pi_w + \psi_{0,1} + \tau_{v,w,1})$$

$$\frac{d}{dt}(Y_{v,w}^{1,y,1}) = \gamma_a \theta_y f_{1,y} A_{v,w}^1 + v \pi_w Y_{1-v,w}^{1,y,1} + \iota_{v,w} Y_{v,w}^{1,y,2} - Y_{v,w}^{1,y,1} (\gamma_{1,y} + \mu_{v,w} + \alpha_{1,y,1} + (1-v)\pi_w + \psi_{1,1} + \tau_{v,w,1})$$

$$\frac{d}{dt}(Y_{v,w}^{x,y,1}) = \gamma_a \theta_y f_{x,y} A_{v,w}^1 + \gamma_{x-1,y} Y_{v,w}^{x-1,y,1} + v \pi_w Y_{1-v,w}^{x,y,1} + \iota_{v,w} Y_{v,w}^{x,y,2} - Y_{v,w}^{x,y,1} (\gamma_{x,y} + \mu_{v,w} + \alpha_{x,y,1} + (1-v)\pi_w + \psi_{x,1} + \tau_{v,w,1}); x \in \{2,3\}$$

$$\frac{d}{dt}(Y_{v,w}^{4,y,1}) = \gamma_a \theta_y f_{4,y} A_{v,w}^1 + \gamma_{3,y} Y_{v,w}^{3,y,1} + v \pi_w Y_{1-v,w}^{4,y,1} + \iota_{v,w} Y_{v,w}^{4,y,2} - Y_{v,w}^{4,y,1} (\mu_{v,w} + \alpha_{4,y,1} + (1-v)\pi_w + \psi_{4,1} + \tau_{v,w,1})$$

*MSM taking PrEP:*

$$\frac{d}{dt}(X_{v,w}^2) = \delta \tau_{v,w,1} X_{v,w}^1 + v \pi_w X_{1-v,w}^2 - X_{v,w}^2 (\lambda_{v,w,2} + \mu_{v,w} + (1-v)\pi_w + \iota_{v,w})$$

$$\frac{d}{dt}(A_{v,w}^2) = \lambda_{v,w,2} X_{v,w}^2 + v \pi_w A_{1-v,w}^2 - A_{v,w}^2 (\gamma_a + \mu_{v,w} + \alpha_{0,0,2} + (1-v)\pi_w + \psi_{0,2} + \iota_{v,w} + \tau_{v,w,2})$$

$$\frac{d}{dt}(Y_{v,w}^{1,y,2}) = \gamma_a \theta_y f_{1,y} A_{v,w}^2 + v \pi_w Y_{1-v,w}^{1,y,2} - Y_{v,w}^{1,y,2} (\gamma_{1,y} + \mu_{v,w} + \alpha_{1,y,2} + (1-v)\pi_w + \psi_{1,2} + \iota_{v,w} + \tau_{v,w,2})$$



$$\begin{aligned} \frac{d}{dt}(Y_{v,w}^{x,y,2}) &= \gamma_a \theta_y f_{x,y} A_{v,w}^2 + \gamma_{x-1,y} Y_{v,w}^{x-1,y,2} + v\pi_w Y_{1-v,w}^{x,y,2} \\ &\quad - Y_{v,w}^{x,y,2} (\gamma_{x,y} + \mu_{v,w} + \alpha_{x,y,2} + (1-v)\pi_w + \psi_{x,2} + \iota_{v,w} + \tau_{v,w,2}); x \in \{2,3\} \end{aligned}$$

$$\begin{aligned} \frac{d}{dt}(Y_{v,w}^{4,y,2}) &= \gamma_a \theta_y f_{4,y} A_{v,w}^2 + \gamma_{3,y} Y_{v,w}^{3,y,2} + v\pi_w Y_{1-v,w}^{4,y,2} \\ &\quad - Y_{v,w}^{4,y,2} (\mu_{v,w} + \alpha_{4,y,2} + (1-v)\pi_w + \psi_{4,2} + \iota_{v,w} + \tau_{v,w,2}) \end{aligned}$$

*MSM diagnosed but not in care:*

$$\begin{aligned} \frac{d}{dt}(A_{v,w}^3) &= v\pi_w A_{1-v,w}^3 + (1-q)(\tau_{v,w,1} A_{v,w}^1 + \tau_{v,w,2} A_{v,w}^2) + \omega_w \phi_5 A_{v,w}^4 \\ &\quad - A_{v,w}^3 (\gamma_a + \mu_{v,w} + \alpha_{0,0,3} + (1-v)\pi_w + \psi_{0,3} + \epsilon_w) \end{aligned}$$

$$\begin{aligned} \frac{d}{dt}(Y_{v,w}^{1,y,3}) &= \gamma_a \theta_y f_{1,y} A_{v,w}^3 + v\pi_w Y_{1-v,w}^{1,y,3} + (1-q)(\tau_{v,w,1} Y_{v,w}^{1,y,1} + \tau_{v,w,2} Y_{v,w}^{1,y,2}) \\ &\quad + \omega_w \phi_5 Y_{v,w}^{1,y,4} - Y_{v,w}^{1,y,3} (\gamma_{1,y} + \mu_{v,w} + \alpha_{1,y,3} + (1-v)\pi_w + \psi_{1,3} + \epsilon_w) \end{aligned}$$

$$\begin{aligned} \frac{d}{dt}(Y_{v,w}^{x,y,3}) &= \gamma_a \theta_y f_{x,y} A_{v,w}^3 + \gamma_{x-1,y} Y_{v,w}^{x-1,y,3} + v\pi_w Y_{1-v,w}^{x,y,3} + (1-q)(\tau_{v,w,1} Y_{v,w}^{x,y,1} + \tau_{v,w,2} Y_{v,w}^{x,y,2}) + \omega_w \phi_5 Y_{v,w}^{x,y,4} \\ &\quad - Y_{v,w}^{x,y,3} (\gamma_{x,y} + \mu_{v,w} + \alpha_{x,y,3} + (1-v)\pi_w + \psi_{x,3} + \epsilon_w); x \in \{2,3\} \end{aligned}$$

$$\begin{aligned} \frac{d}{dt}(Y_{v,w}^{4,y,3}) &= \gamma_a \theta_y f_{4,y} A_{v,w}^3 + \gamma_{3,y} Y_{v,w}^{3,y,3} + v\pi_w Y_{1-v,w}^{4,y,3} + (1-q)(\tau_{v,w,1} Y_{v,w}^{4,y,1} + \tau_{v,w,2} Y_{v,w}^{4,y,2}) + \omega_w \phi_5 Y_{v,w}^{4,y,4} \\ &\quad - Y_{v,w}^{4,y,3} (\mu_{v,w} + \alpha_{4,y,3} + (1-v)\pi_w + \psi_{4,3} + \epsilon_w) \end{aligned}$$

*MSM in care:*

$$\begin{aligned} \frac{d}{dt}(A_{v,w}^4) &= v\pi_w A_{1-v,w}^4 + q(\tau_{v,w,1} A_{v,w}^1 + \tau_{v,w,2} A_{v,w}^2) + \epsilon_w A_{v,w}^3 \\ &\quad - A_{v,w}^4 (\gamma_a + \mu_{v,w} + \alpha_{0,0,4} + (1-v)\pi_w + \psi_{0,4} + \omega_w \phi_5 + \xi_0) \end{aligned}$$

$$\begin{aligned} \frac{d}{dt}(Y_{v,w}^{1,y,4}) &= \gamma_a \theta_y f_{1,y} A_{v,w}^4 + v\pi_w Y_{1-v,w}^{1,y,4} + q(\tau_{v,w,1} Y_{v,w}^{1,y,1} + \tau_{v,w,2} Y_{v,w}^{1,y,2}) + \epsilon_w Y_{v,w}^{1,y,3} + \zeta Y_{v,w}^{1,y,10} \\ &\quad - Y_{v,w}^{1,y,4} (\gamma_{1,y} + \mu_{v,w} + \alpha_{1,y,4} + (1-v)\pi_w + \psi_{1,4} + \omega_w \phi_5 + \xi_1) \end{aligned}$$

$$\begin{aligned} \frac{d}{dt}(Y_{v,w}^{x,y,4}) &= \gamma_a \theta_y f_{x,y} A_{v,w}^4 + \gamma_{x-1,y} Y_{v,w}^{x-1,y,4} + v\pi_w Y_{1-v,w}^{x,y,4} + q(\tau_{v,w,1} Y_{v,w}^{x,y,1} + \tau_{v,w,2} Y_{v,w}^{x,y,2}) + \epsilon_w Y_{v,w}^{x,y,3} + \zeta Y_{v,w}^{x,y,10} \\ &\quad - Y_{v,w}^{x,y,4} (\gamma_{x,y} + \mu_{v,w} + \alpha_{x,y,4} + (1-v)\pi_w + \psi_{x,4} + \omega_w \phi_5 + \xi_x); x \in \{2,3\} \end{aligned}$$

$$\begin{aligned} \frac{d}{dt}(Y_{v,w}^{4,y,4}) &= \gamma_a \theta_y f_{4,y} A_{v,w}^4 + \gamma_{3,y} Y_{v,w}^{3,y,4} + v\pi_w Y_{1-v,w}^{4,y,4} + q(\tau_{v,w,1} Y_{v,w}^{4,y,1} + \tau_{v,w,2} Y_{v,w}^{4,y,2}) + \epsilon_w Y_{v,w}^{4,y,3} + \zeta Y_{v,w}^{4,y,10} \\ &\quad - Y_{v,w}^{4,y,4} (\mu_{v,w} + \alpha_{4,y,4} + (1-v)\pi_w + \psi_{4,4} + \omega_w \phi_5 + \xi_4) \end{aligned}$$

*MSM on ART and adherent:*

$$\frac{d}{dt}(A_{v,w}^5) = v\pi_w A_{1-v,w}^5 + \chi \xi_0 A_{v,w}^4 + \sum_{Z=0}^{Z=4} \chi \psi_{0,Z} A_{v,w}^Z - A_{v,w}^5 (\gamma_a + \mu_{v,w} + \alpha_{0,0,5} + (1-v)\pi_w + \sigma_0 + \phi_5)$$

$$\begin{aligned} \frac{d}{dt}(Y_{v,w}^{x,y,5}) &= \gamma_a \theta_y f_{x,y} A_{v,w}^5 + v \pi_w Y_{1-v,w}^{x,y,5} + \chi \xi_x Y_{v,w}^{x,y,4} + \sum_{Z=0}^{Z=4} \chi \psi_{x,Z} Y_{v,w}^{x,y,4} + \chi \psi_{x,10} Y_{v,w}^{x,y,10} \\ &\quad - Y_{v,w}^{x,y,5} (\mu_{v,w} + \alpha_{x,y,5} + (1-v)\pi_w + \sigma_y + \phi_5) \end{aligned}$$

$$\frac{d}{dt}(Y_{v,w}^{x,y,6}) = v \pi_w Y_{1-v,w}^{x,y,6} + \sigma_0 \theta_y f_{x,y} A_{v,w}^5 + \sigma_y Y_{v,w}^{x,y,5} - Y_{v,w}^{x,y,6} (\mu_{v,w} + \alpha_{x,y,6} + (1-v)\pi_w + \eta_y + \phi_6)$$

$$\frac{d}{dt}(Y_{v,w}^{x,y,7}) = v \pi_w Y_{1-v,w}^{x,y,7} + \eta_y Y_{v,w}^{x,y,6} - Y_{v,w}^{x,y,7} (\mu_{v,w} + \alpha_{x,y,7} + (1-v)\pi_w + 1 + \phi_7)$$

$$\frac{d}{dt}(Y_{v,w}^{x,y,8}) = v \pi_w Y_{1-v,w}^{x,y,8} + Y_{v,w}^{x,y,7} - Y_{v,w}^{x,y,8} (\mu_{v,w} + \alpha_{x,y,8} + (1-v)\pi_w + \phi_8)$$

*MSM on ART but non-adherent:*

$$\begin{aligned} \frac{d}{dt}(Y_{v,w}^{1,y,9}) &= (1-\chi)\xi_0 \theta_y f_{1,y} A_{v,w}^4 + (1-\chi)\xi_1 Y_{v,w}^{1,y,4} + \sum_{Z=0}^{Z=4} (1-\chi)\psi_{0,Z} \theta_y f_{1,y} A_{v,w}^Z + \sum_{Z=0}^{Z=4} (1-\chi)\psi_{1,Z} Y_{v,w}^{1,y,Z} + (1 \\ &\quad - \chi)\psi_{x,10} Y_{v,w}^{1,y,10} + v \pi_w Y_{1-v,w}^{1,y,9} - Y_{v,w}^{1,y,9} (\gamma_{1,y} + \mu_{v,w} + \alpha_{1,y,9} + (1-v)\pi_w + \phi_9) \end{aligned}$$

$$\begin{aligned} \frac{d}{dt}(Y_{v,w}^{x,y,9}) &= (1-\chi)\xi_0 \theta_y f_{x,y} A_{v,w}^4 + (1-\chi)\xi_1 Y_{v,w}^{x,y,4} + \sum_{Z=0}^{Z=4} (1-\chi)\psi_{0,Z} \theta_y f_{x,y} A_{v,w}^Z + \sum_{Z=0}^{Z=4} (1-\chi)\psi_{x,Z} Y_{v,w}^{x,y,Z} \\ &\quad + (1-\chi)\psi_{x,10} Y_{v,w}^{x,y,10} + v \pi_w Y_{1-v,w}^{x,y,9} + \gamma_{x-1,y} Y_{v,w}^{x-1,y,9} \\ &\quad - Y_{v,w}^{x,y,9} (\gamma_{x,y} + \mu_{v,w} + \alpha_{x,y,9} + (1-v)\pi_w + \phi_9); x \in \{2,3\} \end{aligned}$$

$$\begin{aligned} \frac{d}{dt}(Y_{v,w}^{4,y,9}) &= (1-\chi)\xi_0 \theta_y f_{4,y} A_{v,w}^4 + (1-\chi)\xi_1 Y_{v,w}^{4,y,4} + \sum_{Z=0}^{Z=4} (1-\chi)\psi_{0,Z} \theta_y f_{4,y} A_{v,w}^Z + \sum_{Z=0}^{Z=4} (1-\chi)\psi_{x,Z} Y_{v,w}^{4,y,Z} + (1 \\ &\quad - \chi)\psi_{x,10} Y_{v,w}^{4,y,10} + v \pi_w Y_{1-v,w}^{4,y,9} + \gamma_3 Y_{v,w}^{3,y,9} - Y_{v,w}^{4,y,9} (\mu_{v,w} + \alpha_{4,y,9} + (1-v)\pi_w + \phi_9) \end{aligned}$$

*MSM dropped out of ART:*

$$\begin{aligned} \frac{d}{dt}(Y_{v,w}^{1,y,10}) &= \sum_{Z=5}^{Z=9} \phi_Z Y_{v,w}^{1,y,Z} + v \pi_w Y_{1-v,w}^{1,y,10} + \theta_y f_{x,y} \phi_5 A_{v,w}^5 \\ &\quad - Y_{v,w}^{1,y,10} (\gamma_{1,y} + \mu_{v,w} + \alpha_{1,y,10} + (1-v)\pi_w + \psi_{1,10} + \zeta) \end{aligned}$$

$$\begin{aligned} \frac{d}{dt}(Y_{v,w}^{x,y,10}) &= \sum_{Z=5}^{Z=9} \phi_Z Y_{v,w}^{x,y,Z} + v \pi_w Y_{1-v,w}^{x,y,10} + \theta_y f_{x,y} \phi_5 A_{v,w}^5 + \gamma_{x-1,y} Y_{v,w}^{x-1,y,10} \\ &\quad - Y_{v,w}^{x,y,10} (\gamma_{x,y} + \mu_{v,w} + \alpha_{x,y,10} + (1-v)\pi_w + \psi_{x,10} + \zeta); x \in \{2,3\} \end{aligned}$$

$$\begin{aligned} \frac{d}{dt}(Y_{v,w}^{4,y,10}) &= \sum_{Z=5}^{Z=9} \phi_Z Y_{v,w}^{4,y,Z} + v \pi_w Y_{1-v,w}^{4,y,10} + \theta_y f_{x,y} \phi_5 A_{v,w}^5 + \gamma_3 Y_{v,w}^{3,y,10} \\ &\quad - Y_{v,w}^{4,y,10} (\mu_{v,w} + \alpha_{4,y,10} + (1-v)\pi_w + \psi_{4,10} + \zeta) \end{aligned}$$

Force of infection

Not on PrEP:

$$\lambda_{v,w,1} = 1 - \left( \prod_{j=1}^{j=3} \prod_{v'=0}^{v'=1} \prod_{w'=0}^{w'=1} \left( \frac{\sum_{z=0}^{z=2} (X_{v',w'}^z)}{N_{v',w'}} + \frac{\sum_{z=0}^{z=4} (A_{v',w'}^z)}{N_{v',w'}} (1 - d_1 \beta (1 - e_c s_{c,j}) (1 - e_n s_n)) \right)^{n_j} \right. \\ + \sum_{y=1}^{y=4} \left( \frac{\sum_{x=1}^{x=3} (\sum_{z=0}^{z=4} (Y_{v',w'}^{x,y,z}) + Y_{v',w'}^{x,y,9} + Y_{v',w'}^{x,y,10})}{N_{v',w'}} (1 - h_y \beta (1 - e_c s_{c,j}) (1 - e_n s_n)) \right)^{n_j} \\ + \sum_{y=1}^{y=4} \left( \frac{(\sum_{z=0}^{z=4} (Y_{v',w'}^{4,y,z}) + Y_{v',w'}^{4,y,9} + Y_{v',w'}^{4,y,10})}{N_{v',w'}} (1 - d_2 h_y \beta (1 - e_c s_{c,j}) (1 - e_n s_n)) \right)^{n_j} \\ + \frac{A_{v',w'}^5}{N_{v',w'}} (1 - d_3 \beta (1 - e_c s_{c,j}) (1 - e_n s_n))^{n_j} \\ + \sum_{y=1}^{y=4} \left( \frac{\sum_{x=1}^{x=3} (Y_{v',w'}^{x,y,5})}{N_{v',w'}} (1 - d_4 h_y \beta (1 - e_c s_{c,j}) (1 - e_n s_n)) \right)^{n_j} \\ + \sum_{y=1}^{y=4} \left( \frac{(Y_{v',w'}^{4,y,5})}{N_{v',w'}} (1 - d_5 h_y \beta (1 - e_c s_{c,j}) (1 - e_n s_n)) \right)^{n_j} \\ \left. + \sum_{y=1}^{y=4} \left( \frac{\sum_{x=1}^{x=4} \sum_{z=6}^{z=8} (Y_{v',w'}^{x,y,z})}{N_{v',w'}} (1 - d_6 h_y \beta (1 - e_c s_{c,j}) (1 - e_n s_n)) \right)^{n_j} \right)^{\rho_{vw,v',w',j} c_{v,w,j}}$$

On PrEP:

$$\lambda_{v,w,1} = 1 - \left( \prod_{j=1}^{j=3} \prod_{v'=0}^{v'=1} \prod_{w'=0}^{w'=1} \left( \frac{\sum_{z=0}^{z=2} (X_{v',w'}^z)}{N_{v',w'}} + \frac{\sum_{z=0}^{z=4} (A_{v',w'}^z)}{N_{v',w'}} (1 - d_1 \beta (1 - e_c s_{c,j}) (1 - e_n s_n) (1 - e_p s_{p,v,w})) \right)^{n_j} \right. \\ + \sum_{y=1}^{y=4} \left( \frac{\sum_{x=1}^{x=3} (\sum_{z=0}^{z=4} (Y_{v',w'}^{x,y,z}) + Y_{v',w'}^{x,y,9} + Y_{v',w'}^{x,y,10})}{N_{v',w'}} (1 - h_y \beta (1 - e_c s_{c,j}) (1 - e_n s_n) (1 - e_p s_{p,v,w})) \right)^{n_j} \\ - e_p s_{p,v,w} \left. \right)^{n_j} \\ + \sum_{y=1}^{y=4} \left( \frac{(\sum_{z=0}^{z=4} (Y_{v',w'}^{4,y,z}) + Y_{v',w'}^{4,y,9} + Y_{v',w'}^{4,y,10})}{N_{v',w'}} (1 - d_2 h_y \beta (1 - e_c s_{c,j}) (1 - e_n s_n) (1 - e_p s_{p,v,w})) \right)^{n_j} \\ + \frac{A_{v',w'}^5}{N_{v',w'}} (1 - d_3 \beta (1 - e_c s_{c,j}) (1 - e_n s_n) (1 - e_p s_{p,v,w}))^{n_j} \\ + \sum_{y=1}^{y=4} \left( \frac{\sum_{x=1}^{x=3} (Y_{v',w'}^{x,y,5})}{N_{v',w'}} (1 - d_4 h_y \beta (1 - e_c s_{c,j}) (1 - e_n s_n) (1 - e_p s_{p,v,w})) \right)^{n_j} \\ + \sum_{y=1}^{y=4} \left( \frac{(Y_{v',w'}^{4,y,5})}{N_{v',w'}} (1 - d_5 h_y \beta (1 - e_c s_{c,j}) (1 - e_n s_n) (1 - e_p s_{p,v,w})) \right)^{n_j} \\ + \sum_{y=1}^{y=4} \left( \frac{\sum_{x=1}^{x=4} \sum_{z=6}^{z=8} (Y_{v',w'}^{x,y,z})}{N_{v',w'}} (1 - d_6 h_y \beta (1 - e_c s_{c,j}) (1 - e_n s_n) (1 - e_p s_{p,v,w})) \right)^{n_j} \\ \left. - e_p s_{p,v,w} \right)^{\rho_{vw,v',w',j} c_{v,w,j}}$$

where the total number of MSM partners in age group  $v'$  and race group  $w'$  is calculated as:

$$N_{v',w'} = \sum_{z=0}^{z=1} (X_{v',w'}^z) + \sum_{z=0}^{z=4} (A_{v',w'}^z) + \sum_{x=1}^{x=4} \sum_{y=1}^{y=4} \sum_{z=0}^{z=9} (Y_{v',w'}^{x,y,z})$$

Infection risk is estimated for three partner types ( $j = 1$ : regular partners,  $j = 2$ : casual partners;  $j = 3$ : commercial partners).  $e_c$  is per-sex-act condom efficacy,  $s_{c,j}$  is the proportion of sex acts in which a condom is used with partners of type  $j$ ,  $e_n$  is per-sex act reduction in HIV acquisition risk due to male circumcision,  $s_n$  is the proportion of MSM who are circumcised,  $e_p$  is the per-sex act reduction in HIV acquisition due to PrEP use, and  $s_{p,v,w}$  is the proportion of men in each age and race group who are adherent to PrEP.  $\beta$  is the average probability of acquiring HIV infection from an anal sex act with an HIV-positive male partner with chronic infection and CD4>200 cells per  $\mu\text{L}$  who is not taking ART,  $\rho_{vw,v'w',j}$  is, for MSM in age group  $v$  and race group  $w$ , the proportion of partners of type  $j$  who are in age group  $v'$  and race group  $w'$ .  $c_{v,w,j}$  is the average number of new partners per year of type  $j$  for MSM in age group  $v$  and race group  $w$ ,  $n_j$  is the average number of sex acts per partnership for a partnership of type  $j$ ,  $d_1$  is the relative infectiousness of those in the acute versus chronic stage of infection,  $d_2$  is the relative infectiousness of those with CD4<200 cells per  $\mu\text{L}$  versus those with chronic infection and CD4>200 cells per  $\mu\text{L}$ ,  $d_3, d_4, d_5$  are the relative infectiousness of those on ART with a partially suppressed viral load who have acute infection, chronic infection (CD4>200 cells per  $\mu\text{L}$ ) or CD4<200 cells per  $\mu\text{L}$ , respectively, versus those untreated with chronic infection and CD4>200 cells per  $\mu\text{L}$ ,  $d_6$  is the relative infectiousness of those on ART with a fully suppressed viral load versus those untreated with chronic infection and CD4>200 cells per  $\mu\text{L}$ , and  $h_y$  is the relative infectiousness of those not fully virally suppressed who have SPVL  $y$ .

The relative infectiousness of those on ART with a partially suppressed viral load are calculated as follows:

$$d_3 = d_6 + d_r(d_1 - d_6)$$

$$d_4 = d_6 + d_r(1 - d_6)$$

$$d_5 = d_6 + d_r(d_2 - d_6)$$

Where  $d_r$  is the relative level of infectiousness of those partially suppressed, scaled between the level for those fully suppressed ( $d_r = 0$ ) and those unsuppressed ( $d_r = 1$ ).

### Disability-adjusted life years (DALYs)

Disability-adjusted life years (DALYs) were calculated by summing up person-years spent in different CD4 count and ART categories (uninfected, HIV-positive on ART or CD4>350 cells per  $\mu\text{L}$ , HIV-positive off ART with CD4 200-350 cells per  $\mu\text{L}$ , HIV-positive off ART with CD4<200 cells per  $\mu\text{L}$ ), weighted with disability weights from the 2013 Global Burden of Disease study.<sup>3</sup>

## **Model calibration details**

### **Data sources – model parameters and fitting outcomes**

Published estimates were used to inform parameters relating to HIV disease progression, HIV transmission probabilities and intervention efficacy, where possible from MSM populations (Table S1, p14-20).

Wherever possible, local data was used to inform parameters relating to demography, sexual risk behaviour and intervention behaviour.

National HIV Behavioral Surveillance (NHBS) data for MSM in Baltimore were used to estimate the initial age and race distribution of the MSM population, numbers of sexual partners, condom use, sexual mixing, HIV testing and levels of circumcision. NHBS were serial cross-sectional studies conducted among MSM in Baltimore (we used the 2004, 2008, 2011 and 2014 rounds). At least 400 MSM were recruited at each round using venue-based, time-space sampling, and given a face-to-face behavioural interview and HIV testing.<sup>4-6</sup>

Data from the US PrEP Demo project were used to estimate rates of PrEP adherence and dropout. The PrEP Demo Project enrolled MSM and TGW from STI clinics in San Francisco and Miami and a community health centre in Washington DC between 2012 and 2014 and followed participants for 48 weeks.<sup>7</sup> We used data from the 259 participants who were referred to the study by their clinic and enrolled.

Fitting and validation outcomes for HIV prevalence (2004,2008, 2011, 2014) and PrEP coverage (2014, 2017) came from NHBS surveys. Data on ART coverage were from a sub-study conducted among Baltimore MSM (2008, 2011, 2014) who consented for their sera to be stored for future testing. Stored sera from HIV positive men (>120 at each round) were tested for antiretrovirals.<sup>8</sup>

Fitting and validation outcomes for the proportion of MSM in care and virally suppressed came from annual surveillance data for Baltimore MSM (>3000 each year) from the Maryland Department of Health for 2012-2017.

All parameters are given in Table S1 (p14-20), fitting outcomes in Table S2 (p21-22).

### **Mixing parameters**

Mixing patterns by age and race were estimated from NHBS data. Data from the 2008 NHBS survey was available on the race of sexual partners, and data from the 2011 survey on the age and race of sexual partners (note that the age-group of partners could only be estimated for MSM aged 18-24). Using data on respondent and reported partner age and race, on the overall number of anal sex partners per year reported by each age- and race-group, and assuming that the proportion of MSM in each age and race group in the survey was similar to that in the wider MSM population, least-squares fitting was used to estimate the mixing parameters by age and race. The data suggested some preference for partners of a similar age and strong preference for partners of the same race.

### **Parameter ranges**

Uniform priors were used for all of the parameters fitted in model calibration. The ranges used (minimum and maximum values for uniform priors) are given in Table S1 (p14-20). These ranges were estimated either from different values obtained from different data sources, from quantified uncertainty (e.g. 95% CI) from a single data source, or using a fixed margin (e.g.  $\pm 5$ pp) around estimates from a single data source (see details in Table S1, p14-20).

### **Calibrating the model to PrEP coverage**

Age- and race-specific rates of PrEP adherence and retention were assumed to be the same as for clinic-referred MSM in the US PrEP Demo project<sup>7,9</sup>. We assumed PrEP use started in 2012, with PrEP initiation (the proportion of HIV-uninfected MSM initiating PrEP following routine HIV testing) increasing linearly up to 2020. The model was calibrated to 2014 and 2017 NHBS survey data on PrEP coverage<sup>10,11</sup>, by varying the final level of PrEP initiation (i.e. the proportion initiating PrEP following routine HIV testing in 2020), until PrEP coverage in the model lay between 40% and 100% of the survey data estimate (which was of any PrEP use in the preceding 12 months). All other non-PrEP-related parameters were kept the same. Because PrEP use was very low in 2014 (2.8% reported any PrEP use in the previous 12 months in the NHBS survey), modelled fits to HIV prevalence remained consistent with data when PrEP was included (Fig S4, p23-25).

## **Modelling COVID-19-related disruptions**

Disruptions to HIV testing, ART and PrEP initiation were represented in the model by reducing rates of HIV testing, ART and PrEP initiation by the estimated amount. Disruptions to condom use and reductions in partner numbers were represented by reducing levels of condom use and partner numbers by the estimated amount. Reductions in PrEP adherence (representing temporary cessation of PrEP use during the disruption period) were modelled as a proportion of MSM on PrEP becoming non-adherent to PrEP. Reductions in viral suppression among those on ART were represented by increases in HIV transmissibility and mortality for those in the virally suppressed compartment, weighted by the proportion of people assumed to no longer be virally suppressed (who were assumed to have the same infectiousness and mortality as those not on ART).

## Tables – Parameters and Fitting Data

**Table S1. Parameters used in the HIV transmission model, with source and justification**

| Symbol                    | Parameter                                                                                   | Range of values <sup>a</sup>                                                   | Source/justification                                                                                                                                                                                                                 |
|---------------------------|---------------------------------------------------------------------------------------------|--------------------------------------------------------------------------------|--------------------------------------------------------------------------------------------------------------------------------------------------------------------------------------------------------------------------------------|
| <b>INITIAL CONDITIONS</b> |                                                                                             |                                                                                |                                                                                                                                                                                                                                      |
| $N_0$                     | Initial size of MSM population (1984)                                                       | 6765-8326                                                                      | 260,199 men aged 18+ in the 1980 Baltimore census; Purcell et al. 2012 <sup>12</sup> estimate % of US men had same-sex behaviour last 12 months 2.9% (95% CI 2.6-3.2%)                                                               |
|                           | Percentage of MSM who are black in 1984                                                     | 50-64                                                                          | Main estimate: overall population 1980 census. Upper limit: MSM in NHBS 2004; lower limit: lower 95% CI in NHBS 2004 <sup>1</sup>                                                                                                    |
|                           | Percentage of black MSM aged 18-24 in 1984                                                  | 16-31                                                                          | Lower bound: black men in 2010 census<br>Upper bound: black MSM NHBS 2004 (upper 95% CI) <sup>1</sup>                                                                                                                                |
|                           | Percentage of white MSM aged 18-24 in 1984                                                  | 14-28                                                                          | Lower bound: white men in 2010 census<br>Upper bound: white MSM NHBS 2004 (upper 95% CI) <sup>1</sup>                                                                                                                                |
|                           | HIV prevalence black MSM 1984 (%)                                                           | 15-44                                                                          | MACS baseline black MSM <sup>13</sup> – lower bound a third of this as non-random sample                                                                                                                                             |
|                           | HIV prevalence white MSM 1984 (%)                                                           | 9-28                                                                           | MACS baseline white MSM <sup>13</sup> – lower bound a third of this as non-random sample                                                                                                                                             |
| <b>Demography</b>         |                                                                                             |                                                                                |                                                                                                                                                                                                                                      |
| $\Gamma$                  | Rate at which new MSM join the sexually active MSM population (per year)                    | 100-400 (fitting to census demography)<br>200-800 (fitting to NHBS demography) | estimate                                                                                                                                                                                                                             |
| $m_{black}$               | Percentage of new incoming MSM who are black                                                | 60-85                                                                          | Baltimore census 1990-2010; NHBS 2004-2011 <sup>1</sup>                                                                                                                                                                              |
| $m_{young,0}$             | Percentage of new incoming black MSM who are aged 18-24 years old                           | 72-87                                                                          | % of black MSM in NHBS who say they entered sexually active Baltimore MSM population aged <25 – 2008 & 2011 NHBS <sup>1</sup>                                                                                                        |
| $m_{young,1}$             | Percentage of new incoming white MSM who are aged 18-24 years old                           | 50-71 (fitting to census demography)<br>37-71 (fitting to NHBS demography)     | % of white MSM in NHBS who say they entered sexually active Baltimore MSM population aged <25 – 2008 & 2011 NHBS <sup>1</sup>                                                                                                        |
| $\pi_0$                   | rate of moving from 18-24 year old age group to >24 year old age group, black MSM, per year | 0.17 (fixed)                                                                   | Mean age at joining the local MSM population in NHBS 2008 and 2011 for 18-24 yr old MSM ~16 yrs old (95% CI 15-17) <sup>1</sup>                                                                                                      |
| $\pi_1$                   | rate of moving from 18-24 year old age group to >24 year old age group, white MSM, per year | 0.17-0.25                                                                      | Mean age at joining the local MSM population in NHBS 2008 and 2011 for 18-24 yr old MSM ~18/19 yrs old (95% CI 16/17-20) <sup>1</sup>                                                                                                |
| $\mu_{0,0}$               | Non-HIV related death rate, 18-24 year old black men, per year                              | 0.0011-0.0015                                                                  | CDC WONDER database data for Maryland; data for 15-24 years olds                                                                                                                                                                     |
| $\mu_{1,0}$               | Non-HIV related death/leaving rate, >24 year old black men, per year                        | 0.011-0.04 (census fitting)<br>0.041-0.11 (NHBS fitting)                       | CDC WONDER database data for Maryland; average death rate over ages 26-64 years old<br>Upper bound: add on 1/36 (double current duration as an MSM)<br>NHBS fitting: additionally assume extra rate of ceasing to attend NHBS venues |
| $\mu_{0,1}$               | Non-HIV related death rate, 18-24 year old white men, per year                              | 0.00075-0.001                                                                  | CDC WONDER database data for Maryland; data for 15-24 years olds                                                                                                                                                                     |
| $\mu_{1,1}$               | Non-HIV related death/leaving rate, >24 year old white men, per year                        | 0.033-0.1 (census fitting)<br>0.058-0.128 (NHBS fitting)                       | High rates reflecting out-migration plus rates of ceasing sexual activity;<br>NHBS fitting: additionally assume extra rate of ceasing to attend NHBS venues                                                                          |
| <b>Sexual behaviour</b>   |                                                                                             |                                                                                |                                                                                                                                                                                                                                      |
| $n_1$                     | Number of sex acts per main partnership                                                     | 40-470                                                                         | 48.2-85.1 sex episodes/year with main partners <sup>14</sup> , partnerships last 3.5-5.5 years <sup>15,16</sup> , but assume some are shorter (~1 year)                                                                              |
| $n_2$                     | Number of sex acts per casual partnership                                                   | 1.5-6                                                                          | 3-4.9 sex episodes/year <sup>14</sup> , partnerships last 0.5-1.3 years <sup>15</sup>                                                                                                                                                |
| $n_3$                     | Number of sex acts per commercial partnership                                               | 1-2                                                                            | assumed                                                                                                                                                                                                                              |

|                                  |                                                                                                                                     |           |                                                                                                                               |
|----------------------------------|-------------------------------------------------------------------------------------------------------------------------------------|-----------|-------------------------------------------------------------------------------------------------------------------------------|
| $c_{0,0,1}$                      | Number of new main partners per year, 18-24 year old black MSM                                                                      | 0.58-0.8  | NHBS 2004, 2008, 2011 <sup>1</sup>                                                                                            |
| $c_{0,0,2}$                      | Number of new casual partners per year, 18-24 year old black MSM 2011 onwards <sup>b</sup>                                          | 1.54-2.09 | NHBS 2011 <sup>1</sup>                                                                                                        |
| $c_{0,0,3}$                      | Number of new commercial partners per year, 18-24 year old black MSM 2011 onwards <sup>b</sup>                                      | 0-1.36    | NHBS 2011 <sup>1</sup>                                                                                                        |
| $c_{1,0,1}$                      | Number of new main partners per year, >24 year old black MSM                                                                        | 0.36-0.57 | NHBS 2004, 2008, 2011 <sup>1</sup>                                                                                            |
| $c_{1,0,2}$                      | Number of new casual partners per year, >24 year old black MSM 2011 onwards <sup>b</sup>                                            | 0.81-1.24 | NHBS 2011 <sup>1</sup>                                                                                                        |
| $c_{1,0,3}$                      | Number of new commercial partners per year, >24 year old black MSM 2011 onwards <sup>b</sup>                                        | 0.15-0.85 | NHBS 2011 <sup>1</sup>                                                                                                        |
| $c_{0,1,1}$                      | Number of new main partners per year, 18-24 year old white MSM                                                                      | 0.08-0.37 | NHBS 2004, 2008, 2011 <sup>1</sup>                                                                                            |
| $c_{0,1,2}$                      | Number of new casual partners per year, 18-24 year old white MSM 2011 onwards <sup>b</sup>                                          | 0.05-0.93 | NHBS 2011 <sup>1</sup>                                                                                                        |
| $c_{0,1,3}$                      | Number of new commercial partners per year, 18-24 year old white MSM 2011 onwards <sup>b</sup>                                      | 0-0.28    | NHBS 2011 <sup>1</sup>                                                                                                        |
| $c_{1,1,1}$                      | Number of new main partners per year, >24 year old white MSM                                                                        | 0.11-0.21 | NHBS 2004, 2008, 2011 <sup>1</sup>                                                                                            |
| $c_{1,1,2}$                      | Number of new casual partners per year, >24 year old white MSM 2011 onwards <sup>b</sup>                                            | 0.28-1.07 | NHBS 2011 <sup>1</sup>                                                                                                        |
| $c_{1,1,3}$                      | Number of new commercial partners per year, >24 year old white MSM 2011 onwards <sup>b</sup>                                        | 0-0.07    | NHBS 2011 <sup>1</sup>                                                                                                        |
| Partner_number_decline           | absolute decline per year in the number of new casual or commercial partners                                                        | 0.17-0.36 | From trends in NHBS data on number of commercial and casual partners 2004-2011 <sup>1</sup>                                   |
| Mixing parameter for age mixing  | Scale between fully proportionate and fully assortative mixing by age                                                               | 0.25-0.35 | estimated from NHBS 2011 data on last partner <sup>1</sup>                                                                    |
| Mixing parameter for race mixing | Scale between fully proportionate and fully assortative mixing by race                                                              | 0.7-0.8   | 0.75 estimated from NHBS 2011 data on last partner and 0.74 from NHBS additional data 2008 <sup>17</sup>                      |
| Early_condom_use                 | Minimum level of condom use at start of the HIV epidemic (% of sex acts)                                                            | 0-30      | No data                                                                                                                       |
| $s_{c,1,0}$                      | Percentage of sex acts in which a condom is used, main partnerships where both partners are black, 2004 onwards <sup>b</sup>        | 47-67     | condom use last sex act reported by black MSM with main partners NHBS 2004-2011 <sup>1</sup>                                  |
| $s_{c,1,1}$                      | Percentage of sex acts in which a condom is used, main partnerships where one or both partners are white, 2004 onwards <sup>b</sup> | 30-39     | condom use last sex act reported by white MSM with main partners NHBS 2004-2011 <sup>1</sup>                                  |
| $s_{c,2}$                        | Percentage of sex acts in which a condom is used, casual partnerships (any race partner), 2004 onwards <sup>b</sup>                 | 63-72     | condom use last sex act reported in casual partnerships NHBS 2004-2011 <sup>1</sup>                                           |
| $s_{c,3}$                        | Percentage of sex acts in which a condom is used, commercial partnerships (any race partner), 2004 onwards <sup>b</sup>             | 21-78     | condom use last sex act reported in commercial partnerships NHBS 2004 & 2008 <sup>1</sup>                                     |
| Condom_increase_1                | Yearly increase in % of sex acts in which condoms are used, all partnerships prior to 2008                                          | 2.4-4     | From trend in data from NHBS 2004-2008, averaging over condom use in main and casual partnerships <sup>1</sup>                |
| Condom_increase_2                | Yearly increase in % of sex acts in which condoms are used, all partnerships between 2008 and 2011                                  | -2.4+0.2  | From trends in data from NHBS 2008-2011 and 2008-2014, averaging over condom use in main and casual partnerships <sup>1</sup> |
| <i>HIV disease progression</i>   |                                                                                                                                     |           |                                                                                                                               |
| $1/\gamma_a$                     | Average duration of acute infection, months                                                                                         | 2-6       | 18,19                                                                                                                         |
| $\alpha_{0,0,z}$                 | HIV-related death rate for those with acute HIV infection, per year                                                                 | 0 (fixed) | assumption                                                                                                                    |



|                                                                                                                                                  |                                                                                                                                                                |               |                                                                                                                  |
|--------------------------------------------------------------------------------------------------------------------------------------------------|----------------------------------------------------------------------------------------------------------------------------------------------------------------|---------------|------------------------------------------------------------------------------------------------------------------|
| $\alpha_{1,y,0}$<br>$\alpha_{1,y,1}$<br>$\alpha_{1,y,2}$<br>$\alpha_{1,y,3}$<br>$\alpha_{1,y,8}$<br>$\alpha_{1,y,9}$                             | HIV-related death rate for those with CD4>500, off ART, per year                                                                                               | 0.0009-0.0054 | aged 25-44 in the European CASCADE cohort <sup>20</sup> ; general population death rate subtracted               |
| $\alpha_{2,y,0}$<br>$\alpha_{2,y,1}$<br>$\alpha_{2,y,2}$<br>$\alpha_{2,y,3}$                                                                     | HIV-related death rate for those with CD4 350-500, off ART, per year                                                                                           | 0.0009-0.0069 | aged 25-44 in the European CASCADE cohort <sup>20</sup> ; general population death rate subtracted               |
| $\alpha_{3,y,1}$<br>$\alpha_{3,y,1}$                                                                                                             | HIV related death rate for those with CD4 200-350, off ART, per year                                                                                           | 0.0045-0.0135 | aged 25-44 in the European CASCADE cohort <sup>20</sup> ; general population death rate subtracted               |
| $1/\alpha_{4,1,1}$                                                                                                                               | Inverse of HIV-related death rate for those with CD4<200, SPVL<4.0, off ART (years)                                                                            | 3.28-12.87    | Netherlands ATHENA cohort <sup>21</sup>                                                                          |
| $1/\alpha_{4,2,1}$                                                                                                                               | Inverse of HIV-related death rate for those with CD4<200, SPVL 4.0-4.5, off ART (years)                                                                        | 1.43-6.09     | Netherlands ATHENA cohort <sup>21</sup>                                                                          |
| $1/\alpha_{4,3,1}$                                                                                                                               | Inverse of HIV-related death rate for those with CD4<200, SPVL 4.5-5.0, off ART (years)                                                                        | 4.41-23.64    | Netherlands ATHENA cohort <sup>21</sup>                                                                          |
| $1/\alpha_{4,4,1}$                                                                                                                               | Inverse of HIV-related death rate for those with CD4<200, SPVL>5.0, off ART (years)                                                                            | 1.32-3.59     | Netherlands ATHENA cohort <sup>21</sup>                                                                          |
| $\alpha_{1,y,4}, \alpha_{2,y,4}$<br>$\alpha_{1,y,5}, \alpha_{2,y,5}$<br>$\alpha_{1,y,6}, \alpha_{2,y,6}$<br>$\alpha_{1,y,7}$<br>$\alpha_{2,y,7}$ | HIV-related mortality for those with CD4>500 or CD4 350-500 at start of treatment, for 1 <sup>st</sup> , 2 <sup>nd</sup> and subsequent years on ART, per year | 0-0.003       | From probabilities for those with CD4>350 <sup>22</sup> ; general population death rate subtracted <sup>23</sup> |
| $a_1$                                                                                                                                            | Relative mortality of those with CD4 200-350 vs CD4>350 at start of treatment, 1 <sup>st</sup> year on ART                                                     | 1.2-2.8       | <sup>24</sup>                                                                                                    |
| $a_2$                                                                                                                                            | Relative mortality of those with CD4 200-350 vs CD4>350 at start of treatment, 2 <sup>nd</sup> year on ART                                                     | 1-2.2         | <sup>24</sup> Upper limit reduced to give main estimate as midpoint                                              |
| $a_3$                                                                                                                                            | Relative mortality of those with CD4 200-350 vs CD4>350 at start of treatment, 3 <sup>rd</sup> year + on ART                                                   | 1-1.4         | <sup>24</sup> Upper limit reduced to give main estimate as midpoint                                              |
| $a_4$                                                                                                                                            | Relative mortality of those with CD4 <200 vs CD4>350 at start of treatment, 1 <sup>st</sup> year on ART                                                        | 1.8-5.2       | <sup>24</sup> Main estimate and lower bound: CD4 100-199; upper bound from those with CD4 25-49                  |
| $a_5$                                                                                                                                            | Relative mortality of those with CD4 <200 vs CD4>350 at start of treatment, 2 <sup>nd</sup> year on ART                                                        | 1.3-6.2       | <sup>24</sup> Main estimate and lower bound: CD4 100-199; upper bound from those with CD4 25-49                  |
| $a_6$                                                                                                                                            | Relative mortality of those with CD4 <200 vs CD4>350 at start of treatment, 3 <sup>rd</sup> year + on ART                                                      | 1-3.2         | <sup>24</sup> Main estimate and lower bound: CD4 100-199; upper bound from those with CD4 50-99                  |
| $b_1$                                                                                                                                            | Relative mortality of those with AIDS before ART initiation vs without, 1 <sup>st</sup> year on ART                                                            | 3.0-4.8       | <sup>24</sup>                                                                                                    |
| $b_2, b_3$                                                                                                                                       | Relative mortality of those with AIDS before ART initiation vs without, 2 <sup>nd</sup> , 3 <sup>rd</sup> + years on ART                                       | 1.4-2.6       | <sup>24</sup>                                                                                                    |
| $k_4$                                                                                                                                            | Percentage of those starting ART with CD4<200 who have a prior AIDS diagnosis                                                                                  | 40-60         | <sup>25</sup>                                                                                                    |
| $\theta_2$                                                                                                                                       | Percentage of HIV-positive MSM with a SPVL 4.0-4.5                                                                                                             | 25 (fixed)    | Netherlands ATHENA cohort <sup>21</sup> ; US MSM (MACS cohort) <sup>26,27</sup>                                  |
| $\theta_3$                                                                                                                                       | Percentage of HIV-positive MSM with a SPVL 4.5-5.0                                                                                                             | 25-40         | Netherlands ATHENA cohort <sup>21</sup> ; US MSM (MACS cohort) <sup>26,27</sup>                                  |
| $\theta_4$                                                                                                                                       | Percentage of HIV-positive MSM with a SPVL >5.0                                                                                                                | 10-25         | Netherlands ATHENA cohort <sup>21</sup> ; US MSM (MACS cohort) <sup>27</sup>                                     |

|                  |                                                                                                                                 |            |                                                                                                                                  |
|------------------|---------------------------------------------------------------------------------------------------------------------------------|------------|----------------------------------------------------------------------------------------------------------------------------------|
| $1/\gamma_{1,1}$ | Average duration spent with CD4>500 cells per $\mu\text{L}$ , for those with SPVL <4.0 (years)                                  | 4.56-6.37  | Netherlands ATHENA cohort <sup>21</sup>                                                                                          |
| $1/\gamma_{2,1}$ | Average duration spent with CD4 350-500, for those with SPVL <4.0 (years)                                                       | 2.98-4.53  | Netherlands ATHENA cohort <sup>21</sup>                                                                                          |
| $1/\gamma_{3,1}$ | Average duration spent with CD4 200-350, for those with SPVL <4.0 (years)                                                       | 5.04-13.69 | Netherlands ATHENA cohort <sup>21</sup>                                                                                          |
| $1/\gamma_{1,2}$ | Average duration spent with CD4>500, for those with SPVL 4.0-4.5 (years)                                                        | 2.68-3.64  | Netherlands ATHENA cohort <sup>21</sup>                                                                                          |
| $1/\gamma_{2,2}$ | Average duration spent with CD4 350-500, for those with SPVL 4.0-4.5 (years)                                                    | 2.65-3.64  | Netherlands ATHENA cohort <sup>21</sup>                                                                                          |
| $1/\gamma_{3,2}$ | Average duration spent with CD4 200-350, for those with SPVL 4.0-4.5 (years)                                                    | 5.46-15.55 | Netherlands ATHENA cohort <sup>21</sup>                                                                                          |
| $1/\gamma_{1,3}$ | Average duration spent with CD4>500, for those with SPVL 4.5-5.0 (years)                                                        | 2.08-2.64  | Netherlands ATHENA cohort <sup>21</sup>                                                                                          |
| $1/\gamma_{2,3}$ | Average duration spent with CD4 350-500, for those with SPVL 4.5-5.0 (years)                                                    | 1.98-2.72  | Netherlands ATHENA cohort <sup>21</sup>                                                                                          |
| $1/\gamma_{3,3}$ | Average duration spent with CD4 200-350, for those with SPVL 4.5-5.0 (years)                                                    | 4.73-10.22 | Netherlands ATHENA cohort <sup>21</sup>                                                                                          |
| $1/\gamma_{1,4}$ | Average duration spent with CD4>500, for those with SPVL $\geq 5.0$ (years)                                                     | 1.28-1.76  | Netherlands ATHENA cohort <sup>21</sup>                                                                                          |
| $1/\gamma_{2,4}$ | Average duration spent with CD4 350-500, for those with SPVL $\geq 5.0$ (years)                                                 | 1.22-1.69  | Netherlands ATHENA cohort <sup>21</sup>                                                                                          |
| $1/\gamma_{3,4}$ | Average duration spent with CD4 200-350, for those with SPVL $\geq 5.0$ (years)                                                 | 2.12-4.19  | Netherlands ATHENA cohort <sup>21</sup>                                                                                          |
| $1/\sigma_0$     | Average duration from ART initiation to viral suppression (VL < 200 copies/ml) for those with acute HIV infection (months)      | 3.93-8.50  | Pregnant women, Kenya <sup>28</sup>                                                                                              |
| $1/\sigma_1$     | Average duration from ART initiation to viral suppression (VL < 200 copies/ml) for those with $\log_{10}$ SPVL <4.0 (months)    | 0.95-4.1   | Data from Johns Hopkins (Baltimore) and Fenway (Boston); estimate is weighted average of median values from 2 sites <sup>1</sup> |
| $1/\sigma_2$     | Average duration from ART initiation to viral suppression (VL < 200 copies/ml) for those with $\log_{10}$ SPVL 4.0-4.5 (months) | 1.03-4.75  | Data from Johns Hopkins (Baltimore) and Fenway (Boston); estimate is weighted average of median values from 2 sites <sup>1</sup> |
| $1/\sigma_3$     | Average duration from ART initiation to viral suppression (VL < 200 copies/ml) for those with $\log_{10}$ SPVL 4.5-5.0 (months) | 1.4-6.43   | Data from Johns Hopkins (Baltimore) and Fenway (Boston); estimate is weighted average of median values from 2 sites <sup>1</sup> |
| $1/\sigma_4$     | Average duration from ART initiation to viral suppression (VL < 200 copies/ml) for those with $\log_{10}$ SPVL >5.0 (months)    | 2.03-6.49  | Data from Johns Hopkins (Baltimore) and Fenway (Boston); estimate is weighted average of median values from 2 sites <sup>1</sup> |
| $f_{1,1}$        | Percentage with CD4 >500 after seroconversion, for those with SPVL <4.0                                                         | 81-91      | Netherlands ATHENA cohort <sup>21</sup>                                                                                          |
| $f_{3,1}$        | Percentage with CD4 200-350 after seroconversion, for those with SPVL <4.0                                                      | 0-4        | Netherlands ATHENA cohort <sup>21</sup>                                                                                          |
| $f_{4,1}$        | Percentage with CD4 <200 after seroconversion, for those with SPVL <4.0                                                         | 0 (fixed)  | Netherlands ATHENA cohort <sup>21</sup>                                                                                          |
| $f_{1,2}$        | Percentage with CD4 >500 after seroconversion, for those with SPVL 4.0-4.5                                                      | 72-83      | Netherlands ATHENA cohort <sup>21</sup>                                                                                          |
| $f_{3,2}$        | Percentage with CD4 200-350 after seroconversion, for those with SPVL 4.0-4.5                                                   | 1-5        | Netherlands ATHENA cohort <sup>21</sup>                                                                                          |
| $f_{4,2}$        | Percentage with CD4 <200 after seroconversion, for those with SPVL 4.0-4.5                                                      | 0 (fixed)  | Netherlands ATHENA cohort <sup>21</sup>                                                                                          |
| $f_{1,3}$        | Percentage with CD4 >500 after seroconversion, for those with SPVL 4.5-5.0                                                      | 69-79      | Netherlands ATHENA cohort <sup>21</sup>                                                                                          |

|                                   |                                                                                                                                         |                                                                     |                                                                                                                                                                          |
|-----------------------------------|-----------------------------------------------------------------------------------------------------------------------------------------|---------------------------------------------------------------------|--------------------------------------------------------------------------------------------------------------------------------------------------------------------------|
| $f_{3,3}$                         | Percentage with CD4 200-350 after seroconversion, for those with SPVL 4.5-5.0                                                           | 3-8                                                                 | Netherlands ATHENA cohort <sup>21</sup>                                                                                                                                  |
| $f_{4,3}$                         | Percentage with CD4 <200 after seroconversion, for those with SPVL 4.5-5.0                                                              | 0 (fixed)                                                           | Netherlands ATHENA cohort <sup>21</sup>                                                                                                                                  |
| $f_{1,4}$                         | Percentage with CD4 >500 after seroconversion, for those with SPVL $\geq 5.0$                                                           | 64-77                                                               | Netherlands ATHENA cohort <sup>21</sup>                                                                                                                                  |
| $f_{3,4}$                         | Percentage with CD4 200-350 after seroconversion, for those with SPVL $\geq 5.0$                                                        | 2-7                                                                 | Netherlands ATHENA cohort <sup>21</sup>                                                                                                                                  |
| $f_{4,4}$                         | Percentage with CD4 <200 after seroconversion, for those with SPVL $\geq 5.0$                                                           | 0 (fixed)                                                           | Netherlands ATHENA cohort <sup>21</sup>                                                                                                                                  |
| <i>Transmission probabilities</i> |                                                                                                                                         |                                                                     |                                                                                                                                                                          |
| $d_1$                             | Relative infectiousness of HIV-positive partner in acute stage of infection vs chronic & CD4>200 (off ART)                              | 4.47-18.81                                                          | <sup>19</sup>                                                                                                                                                            |
| $d_2$                             | Relative infectiousness of HIV-positive partner in late stage of infection – CD4<200 cells per $\mu$ L vs chronic and CD4>200 (off ART) | 2-8                                                                 | <sup>29,30</sup>                                                                                                                                                         |
| $\beta$                           | Average probability of acquiring HIV infection per sex act with an HIV-positive partner with chronic untreated infection                | 0.0007-0.0285                                                       | <sup>31,32</sup> ; assume 50% of sex acts are insertive                                                                                                                  |
| $h_1$                             | Relative infectiousness of HIV-positive person with $\log_{10}$ SPVL <4.0 vs 4.0-4.5                                                    | 0.337-0.68                                                          | <sup>33</sup> Inverse of pooled increase in transmissibility per log10 decrease in viral load                                                                            |
| $h_2$                             | Relative infectiousness of HIV-positive person with $\log_{10}$ SPVL 4.0-4.5 vs 4.0-4.5                                                 | 1 (fixed)                                                           |                                                                                                                                                                          |
| $h_3$                             | Relative infectiousness of HIV-positive person with $\log_{10}$ SPVL 4.5-5.0 vs 4.0-4.5                                                 | 1 (fixed)                                                           |                                                                                                                                                                          |
| $h_4$                             | Relative infectiousness of HIV-positive person with $\log_{10}$ SPVL >5.0 vs 4.0-4.5                                                    | 1.47-2.97                                                           | <sup>33</sup> pooled increase in transmissibility per log10 increase in viral load                                                                                       |
| <i>Intervention behaviour</i>     |                                                                                                                                         |                                                                     |                                                                                                                                                                          |
| $p$                               | Percentage of new entrants to MSM population who never routinely test for HIV                                                           | 5-13                                                                | NHBS Baltimore MSM 2004-2011: % of those aged >24 years old who report never testing for HIV <sup>1</sup>                                                                |
| $\tau_{0,0}$                      | Percentage of undiagnosed black MSM aged 18-24 testing for HIV in the last year, 2004 onwards <sup>b</sup>                              | 63.8-95.0 (reported testing rates)<br>25.5-47.5 (diagnosis fitting) | NHBS data 2004-2011, self-reported HIV negative men; converted into rate of testing at least once per year in the model <sup>1</sup><br>Diagnosis fitting: 60% reduction |
| $\tau_{0,1}$                      | Percentage of undiagnosed white MSM aged 18-24 testing for HIV in the last year, 2004 onwards <sup>b</sup>                              | 32.1-82.3 (reported testing rates)<br>12.8-41.2 (diagnosis fitting) | NHBS data 2004-2008(highest and lowest from ranges), self-reported HIV negative men <sup>1</sup><br>Diagnosis fitting: 60% reduction                                     |
| $\tau_{1,0}$                      | Percentage of undiagnosed black MSM aged >24 years old testing for HIV in the last year, 2004 onwards <sup>b</sup>                      | 50.0-70.2 (reported testing rates)<br>20.0-35.1 (diagnosis fitting) | NHBS data 2004-2011 (highest and lowest from ranges), self-reported HIV negative men <sup>1</sup><br>Diagnosis fitting: 60% reduction                                    |
| $\tau_{1,1}$                      | Percentage of undiagnosed white MSM aged >24 years old testing for HIV in the last year, 2004 onwards <sup>b</sup>                      | 32.7-69.7 (reported testing rates)<br>13.1-34.9(diagnosis fitting)  | NHBS data 2004-2011 (highest and lowest from ranges), self-reported HIV negative men <sup>1</sup><br>Diagnosis fitting: 60% reduction                                    |
| $\tau_{early}$                    | Percentage of all MSM who tested for HIV in the last year, 1996                                                                         | 20-30 (reported testing rates)<br>8-15 (diagnosis fitting)          | MSM in national NHSDA survey 1996 <sup>34</sup><br>Diagnosis fitting: 60% reduction                                                                                      |
| $\omega$                          | Ratio of rate of dropout from care: rate of dropout from ART                                                                            | 1-7                                                                 | Estimates from US studies - risk of dropout from care for those on vs off ART <sup>35-37</sup>                                                                           |
| $q_i$                             | Percentage of white MSM testing positive for HIV who link to care straight away                                                         | 72-86                                                               | <sup>38-42</sup>                                                                                                                                                         |
| $\epsilon$                        | Rate of linkage to care for those not linking immediately or dropped out, per year                                                      | 0-0.1 (fitting to care and viral suppression data)                  | Estimate                                                                                                                                                                 |

|                          |                                                                                                                              |                                                                                              |                                                                                                                                                          |
|--------------------------|------------------------------------------------------------------------------------------------------------------------------|----------------------------------------------------------------------------------------------|----------------------------------------------------------------------------------------------------------------------------------------------------------|
|                          |                                                                                                                              | 0-0.2<br>0-0.5 (fitting to ART coverage data)                                                |                                                                                                                                                          |
| linkage_inc              | Annual absolute increase in percentage of white MSM who link to care straight away after testing positive for HIV            | 3.5 (fixed)                                                                                  | From changes for MSM in national CDC data <sup>43,44</sup>                                                                                               |
| $\chi$                   | Percentage of white MSM initiating ART who are adherent (achieve viral suppression)                                          | 73-99                                                                                        | 42,45-47                                                                                                                                                 |
| $\xi_x$                  | Rate of initiation onto ART from care, when meeting CD4 criteria <sup>c</sup> , per year <sup>b</sup>                        | 0.5-2.1 (fitting to care and viral suppression data)<br>1.1-4 (fitting to ART coverage data) | Assuming CD4 testing every 3-6 months (national guidelines), acceptance 80-90% <sup>48</sup>                                                             |
| $\psi_{0,z}, \psi_{1,z}$ | Rate of starting HAART due to AIDS symptoms, CD4>500, per year (post-1996)                                                   | 0.002-0.01                                                                                   | Incidence of AIDS-defining illness among ART naives, CASCADE collaboration <sup>49</sup> ; similar estimates from EURO-COORD data analysis <sup>50</sup> |
| $\psi_{2,z}$             | Rate of starting HAART due to AIDS symptoms, CD4 350-500, per year (post-1996)                                               | 0.008-0.015                                                                                  | Incidence of AIDS-defining illness among ART naives, CASCADE collaboration <sup>49</sup> ; similar estimates from EURO-COORD data analysis <sup>50</sup> |
| $\psi_{3,z}$             | Rate of starting HAART due to AIDS symptoms, CD4 200-350, per year (post-1996)                                               | 0.018-0.032                                                                                  | Incidence of AIDS-defining illness among ART naives, CASCADE collaboration <sup>49</sup> ; similar estimates from EURO-COORD data analysis <sup>50</sup> |
| $\psi_{4,z}$             | Rate of starting HAART due to AIDS symptoms, CD4<200, per year (post-1996)                                                   | 0.173-0.262                                                                                  | Incidence of AIDS-defining illness among ART naives, CASCADE collaboration <sup>49</sup>                                                                 |
| $\phi_4\phi_5\phi_6$     | Dropout from ART, not fully suppressed/1 <sup>st</sup> year on ART/2 <sup>nd</sup> year on ART, per year                     | 0.06-0.13                                                                                    | Rate of dropout from ART, US <sup>51, 35, 36,37, 52</sup>                                                                                                |
| $\phi_zratio$            | Ratio of dropout from ART 3 <sup>rd</sup> + years: dropout 1 <sup>st</sup> , 2 <sup>nd</sup> years ( $\phi_7: \phi_4$ )      | 0.5-1.0                                                                                      | Rate of dropout from US ART cohorts <sup>53</sup>                                                                                                        |
| $\zeta$                  | Rate of re-enrolment into pre-ART HIV care for those dropping out of ART, per year                                           | 0.05-1                                                                                       | From rate of dropout and re-joining US ART cohorts <sup>53</sup>                                                                                         |
| $s_n$                    | Percentage of MSM circumcised                                                                                                | 77-89                                                                                        | NHBS 2008 & 2011 <sup>1</sup>                                                                                                                            |
| $\epsilon_{ratio}$       | Ratio of rates of linkage to care for black:white MSM (ratio also applied to percentage linking immediately after diagnosis) | 1-2 (fitting to care and viral suppression data)<br>0.84-1.5 (fitting to ART coverage data)  | <sup>38,42</sup>                                                                                                                                         |
| $\omega_{ratio}$         | Ratio of dropout from care for white:black MSM                                                                               | 1-3 (fitting to care and viral suppression data)<br>0.46-1.54 (fitting to ART coverage data) | <sup>35,51,52, 36,37,54</sup>                                                                                                                            |
| $\xi_{ratio}$            | Ratio of ART initiation rate for black:white MSM                                                                             | 0.4-1.0                                                                                      | <sup>37</sup>                                                                                                                                            |
| $\phi_wratio$            | Ratio of ART dropout for black:white MSM                                                                                     | 0.7-1.6                                                                                      | <sup>51,53</sup>                                                                                                                                         |
| $\chi_{ratio}$           | Ratio of percentage adherent to ART black:white MSM                                                                          | 0.82-1                                                                                       | <sup>35,42,45-47,55</sup>                                                                                                                                |
| $\delta$                 | Proportion of negative HIV tests after which PrEP is offered in 2020                                                         | 0.08-0.354                                                                                   | Range explored; rate increases linearly from 0 in 2012                                                                                                   |
| $s_{p00}$                | Adherence to PrEP (% taking $\geq 4$ doses/week), 18-24 year old black MSM                                                   | 0.63 (fixed)                                                                                 | Stratified analysis of US PrEP Demo project data among those clinic-referred                                                                             |
| $s_{p01}$                | Adherence to PrEP (% taking $\geq 4$ doses/week), 18-24 year old white MSM                                                   | 0.9 (fixed)                                                                                  | Stratified analysis of US PrEP Demo project data among those clinic-referred                                                                             |
| $s_{p10}$                | Adherence to PrEP (% taking $\geq 4$ doses/week), >24 year-old black MSM                                                     | 0.42 (fixed)                                                                                 | Stratified analysis of US PrEP Demo project data among those clinic-referred                                                                             |
| $s_{p11}$                | Adherence to PrEP (% taking $\geq 4$ doses/week), >24 year-old white MSM                                                     | 0.87 (fixed)                                                                                 | Stratified analysis of US PrEP Demo project data among those clinic-referred                                                                             |
| $t_{00}$                 | PrEP dropout, 18-24 year old black MSM                                                                                       | 0.67 (fixed)                                                                                 | Proportion not retained at the end of the study, stratified analysis of US PrEP Demo project data among those clinic-referred                            |

|                              |                                                                                                                                                                                   |              |                                                                                                                                                                                                                                            |
|------------------------------|-----------------------------------------------------------------------------------------------------------------------------------------------------------------------------------|--------------|--------------------------------------------------------------------------------------------------------------------------------------------------------------------------------------------------------------------------------------------|
| $t_{01}$                     | PrEP dropout, 18-24 year old white MSM                                                                                                                                            | 0.25 (fixed) | Proportion not retained at the end of the study, stratified analysis of US PrEP Demo project data among those clinic-referred                                                                                                              |
| $t_{10}$                     | PrEP dropout >24 year-old black MSM                                                                                                                                               | 0.19 (fixed) | Proportion not retained at the end of the study, stratified analysis of US PrEP Demo project data among those clinic-referred                                                                                                              |
| $t_{11}$                     | PrEP dropout >24 year-old white MSM                                                                                                                                               | 0.21 (fixed) | Proportion not retained at the end of the study, stratified analysis of US PrEP Demo project data among those clinic-referred                                                                                                              |
| <i>Intervention efficacy</i> |                                                                                                                                                                                   |              |                                                                                                                                                                                                                                            |
| $e_c$                        | Per-sex-act reduction in HIV acquisition risk due to correct condom use (%)                                                                                                       | 58-79        | Estimate for US MSM <sup>56</sup>                                                                                                                                                                                                          |
| $e_n$                        | Per-sex-act reduction in HIV acquisition risk due to male circumcision (%)                                                                                                        | 12-23        | Assuming same efficacy as for heterosexual men from RCTs <sup>57</sup> , only protective in insertive acts, half of all sex acts are insertive, receptive sex acts carry a 2.3x higher risk of transmission than insertive <sup>32</sup> . |
| $d_r$                        | Relative level of infectiousness of those on ART and partially suppressed, scaled between the level for those fully suppressed ( $d_r = 0$ ) and those unsuppressed ( $d_r = 1$ ) | 0.5(fixed)   | assumption                                                                                                                                                                                                                                 |
| $d_6$                        | Per-sex-act reduction in HIV transmission risk when on ART and fully suppressed vs chronic infection untreated (CD4>200) (%)                                                      | 99-100       | Estimates from discordant MSM partnerships where HIV-positive partner on ART and virally suppressed <sup>58</sup>                                                                                                                          |
| $e_p$                        | Per-sex-act reduction in HIV acquisition risk when adherent to PrEP (taking $\geq 4$ tablets/week)                                                                                | 90 (fixed)   | Minimum efficacy estimated from iPrEx and STRAND trial data analysis for 4 doses/week <sup>59</sup>                                                                                                                                        |
| <i>DALY weights</i>          |                                                                                                                                                                                   |              |                                                                                                                                                                                                                                            |
| D <sub>1</sub>               | DALY weight HIV-positive on ART or CD4 >350 cells per $\mu$ L                                                                                                                     | 0.078        | Global Burden of Disease Study 2013 <sup>3</sup>                                                                                                                                                                                           |
| D <sub>2</sub>               | DALY weight HIV-positive CD4 200–350 cells per $\mu$ L                                                                                                                            | 0.274        | Global Burden of Disease Study 2013 <sup>3</sup>                                                                                                                                                                                           |
| D <sub>3</sub>               | DALY weight HIV-positive CD4 <200 cells per $\mu$ L                                                                                                                               | 0.582        | Global Burden of Disease Study 2013 <sup>3</sup>                                                                                                                                                                                           |

<sup>a</sup>Limits of uniform prior distribution

<sup>b</sup>Final values for time-varying parameters. Earlier values or earlier gradient of parameter function given elsewhere in table S1.

<sup>c</sup>Guideline changes coded in: pre-1996, no initiation of ART <sup>60</sup> From 1996-1998 ART initiation at any CD4 count; from 1998-Feb 2001, initiation from care with CD4<500 (1998 guidelines); from Feb 2001-Dec 2009 initiation with CD4 <350 (2001 guidelines); from Dec 2009-March 2012 initiation from care with CD4<500 (2009 guidelines); from March 2012 onwards initiation from care with any CD4 count (2012 guidelines). These apply to all age and race groups.

**Table S2: Data fitted to, with fitting bounds, source and justification**

| Output                                        | Year | Estimate | Min  | Max  | Source & justification                                                                      | Fitting assumption used for |                              | Used for validation |
|-----------------------------------------------|------|----------|------|------|---------------------------------------------------------------------------------------------|-----------------------------|------------------------------|---------------------|
|                                               |      |          |      |      |                                                                                             | NHBS age/race distribution  | Census age/race distribution |                     |
| <b>Demography</b>                             |      |          |      |      |                                                                                             |                             |                              |                     |
| Total MSM population size                     | 2010 | 6518     | 4270 | 8765 | Range 1.9-3.9% <sup>12</sup> of male population aged 18+ in Baltimore 2010 census (224,742) | ✓                           | ✓                            |                     |
| Percentage of population aged 18-24           | 1990 | 15       | 10   | 20   | Census estimate ± 5pp                                                                       |                             | ✓                            |                     |
|                                               | 2000 | 15       | 10   | 20   | Census estimate ± 5pp                                                                       |                             | ✓                            |                     |
|                                               | 2010 | 16       | 11   | 21   | Census estimate ± 5pp                                                                       |                             | ✓                            |                     |
|                                               | 2004 | 24.8     | 20.3 | 30.0 | NHBS data 95% CI <sup>1</sup>                                                               | ✓                           |                              |                     |
|                                               | 2008 | 30.6     | 22.9 | 40.0 | NHBS data 95% CI <sup>1</sup>                                                               | ✓                           |                              |                     |
| Percentage of white MSM aged 18-24            | 2011 | 30.9     | 21.5 | 42.2 | NHBS data 95% CI <sup>1</sup>                                                               | ✓                           |                              |                     |
|                                               | 2014 | 23.9     | 18.0 | 31.0 | NHBS data 95% CI <sup>1</sup>                                                               |                             |                              | ✓                   |
|                                               | 2010 | 14       | 9    | 19   | Census estimate ± 5pp                                                                       |                             | ✓                            |                     |
|                                               | 2004 | 21.0     | 15.6 | 27.6 | NHBS data 95% CI <sup>1</sup>                                                               | ✓                           |                              |                     |
|                                               | 2008 | 17.1     | 9.4  | 29.3 | NHBS data 95% CI <sup>1</sup>                                                               | ✓                           |                              |                     |
| Percentage of black MSM aged 18-24            | 2011 | 20.7     | 11.8 | 33.7 | NHBS data 95% CI <sup>1</sup>                                                               | ✓                           |                              |                     |
|                                               | 2014 | 14.6     | 8.6  | 23.6 | NHBS data 95% CI <sup>1</sup>                                                               |                             |                              | ✓                   |
|                                               | 2010 | 16       | 11   | 21   | Census estimate ± 5pp                                                                       |                             | ✓                            |                     |
|                                               | 2004 | 24.0     | 18.0 | 31.2 | NHBS data 95% CI <sup>1</sup>                                                               | ✓                           |                              |                     |
|                                               | 2008 | 32.5     | 23.8 | 42.6 | NHBS data 95% CI <sup>1</sup>                                                               | ✓                           |                              |                     |
| Percentage of MSM who are black               | 2011 | 34.3     | 22.3 | 48.7 | NHBS data 95% CI <sup>1</sup>                                                               | ✓                           |                              |                     |
|                                               | 2014 | 27.2     | 19.4 | 36.7 | NHBS data 95% CI <sup>1</sup>                                                               |                             |                              | ✓                   |
|                                               | 1990 | 61       | 56   | 66   | Census estimate ± 5pp                                                                       |                             | ✓                            |                     |
|                                               | 2000 | 68       | 63   | 73   | Census estimate ± 5pp                                                                       |                             | ✓                            |                     |
|                                               | 2010 | 69       | 64   | 74   | Census estimate ± 5pp                                                                       |                             | ✓                            |                     |
| <b>HIV prevalence</b>                         | 2004 | 64.1     | 49.8 | 76.3 | NHBS data 95% CI <sup>1</sup>                                                               | ✓                           |                              |                     |
|                                               | 2008 | 73.1     | 59.3 | 83.6 | NHBS data 95% CI <sup>1</sup>                                                               | ✓                           |                              |                     |
|                                               | 2011 | 84.2     | 71.6 | 91.8 | NHBS data 95% CI <sup>1</sup>                                                               | ✓                           |                              |                     |
|                                               | 2014 | 73.8     | 64.6 | 81.3 | NHBS data 95% CI <sup>1</sup>                                                               |                             |                              | ✓                   |
|                                               |      |          |      |      |                                                                                             | All fitting assumptions     |                              |                     |
| HIV prevalence black MSM aged 18-24 years old | 2004 | 33.0     | 23.6 | 43.8 | NHBS data 95% CI <sup>1</sup>                                                               | ✓                           |                              |                     |
|                                               | 2008 | 31.2     | 20.6 | 44.2 | NHBS data 95% CI <sup>1</sup>                                                               | ✓                           |                              |                     |
|                                               | 2011 | 39.6     | 32.0 | 47.8 | NHBS data 95% CI <sup>1</sup>                                                               | ✓                           |                              |                     |
|                                               | 2014 | 24.1     | 14.5 | 37.1 | NHBS data 95% CI <sup>1</sup>                                                               |                             |                              | ✓                   |
| HIV prevalence black MSM aged >24 years old   | 2004 | 58.4     | 46.7 | 69.3 | NHBS data 95% CI <sup>1</sup>                                                               | ✓                           |                              |                     |
|                                               | 2008 | 51.8     | 42.9 | 60.7 | NHBS data 95% CI <sup>1</sup>                                                               | ✓                           |                              |                     |
|                                               | 2011 | 52.2     | 44.1 | 60.3 | NHBS data 95% CI <sup>1</sup>                                                               | ✓                           |                              |                     |
|                                               | 2014 | 47.4     | 39.4 | 55.5 | NHBS data 95% CI <sup>1</sup>                                                               |                             |                              | ✓                   |
| HIV prevalence white MSM aged 18-24 years old | 2004 |          | 0    | 100  | Numbers too small <sup>1</sup>                                                              |                             |                              |                     |
|                                               | 2008 | 22.2     | 10.1 | 42.0 | NHBS data 95% CI <sup>1</sup>                                                               | ✓                           |                              |                     |
|                                               | 2011 |          | 0    | 100  | Numbers too small <sup>1</sup>                                                              |                             |                              |                     |
|                                               | 2014 |          | 0    | 100  | Numbers too small <sup>1</sup>                                                              |                             |                              |                     |
| HIV prevalence white MSM aged >24 years old   | 2004 | 16.7     | 10.7 | 25.0 | NHBS data 95% CI <sup>1</sup>                                                               | ✓                           |                              |                     |
|                                               | 2008 | 18.4     | 9.4  | 32.9 | NHBS data 95% CI <sup>1</sup>                                                               | ✓                           |                              |                     |
|                                               | 2011 | 19.6     | 12.2 | 29.8 | NHBS data 95% CI <sup>1</sup>                                                               | ✓                           |                              |                     |

|                                                      |           |      |      |      |                                                                                            |                        |                            |   |
|------------------------------------------------------|-----------|------|------|------|--------------------------------------------------------------------------------------------|------------------------|----------------------------|---|
|                                                      | 2014      | 9.1  | 5.0  | 15.9 | NHBS data 95% CI <sup>1</sup>                                                              |                        |                            | ✓ |
| <b>Care continuum indicators</b>                     |           |      |      |      |                                                                                            | NHBS HIV testing rate  | CDC estimates for Maryland |   |
| Percentage of HIV-positive MSM diagnosed             | 2012      | 75.9 | 71.7 | 80.5 | CDC data for Maryland state <sup>61</sup> 95% CI                                           |                        | ✓                          |   |
|                                                      |           |      |      |      |                                                                                            | NHBS ART coverage data | Maryland DH continuum data |   |
| Percentage of all HIV-positive MSM on ART            | 2008      | 39.5 | 31.9 | 47.5 | NHBS ARV detection analysis <sup>8</sup> 95% CI <sup>1</sup>                               | ✓                      |                            |   |
|                                                      | 2011      | 55.4 | 48.0 | 62.6 | NHBS ARV detection analysis 95% CI <sup>1</sup>                                            | ✓                      |                            |   |
|                                                      | 2014      | 70.3 | 61.6 | 77.7 | NHBS ARV detection analysis 95% CI <sup>1</sup>                                            |                        |                            | ✓ |
| Percentage of black HIV-positive MSM on ART          | 2008      | 36.9 | 28.5 | 46.2 | NHBS ARV detection analysis <sup>8</sup> 95% CI <sup>1</sup>                               | ✓                      |                            |   |
|                                                      | 2011      | 51.6 | 43.8 | 59.4 | NHBS ARV detection analysis 95% CI <sup>1</sup>                                            | ✓                      |                            |   |
|                                                      | 2014      | 70.2 | 60.8 | 78.1 | NHBS ARV detection analysis 95% CI <sup>1</sup>                                            |                        |                            | ✓ |
| Percentage of white HIV-positive MSM on ART          | 2008      | 61.1 | 38.6 | 79.7 | NHBS ARV detection analysis <sup>8</sup> 95% CI <sup>1</sup>                               | ✓                      |                            |   |
|                                                      | 2011      |      | 0    | 100  | Numbers too small <sup>1</sup>                                                             |                        |                            |   |
|                                                      | 2014      |      | 0    | 100  | Numbers too small <sup>1</sup>                                                             |                        |                            |   |
| Percentage of diagnosed black MSM in care            | 2012-2013 | 63.5 | 56.7 | 70.3 | Maryland DH <sup>a</sup> ± 5pp min-max for 2012-2013 <sup>1</sup>                          |                        | ✓                          |   |
|                                                      | 2014      | 60.3 | 55.3 | 65.3 | Maryland DH <sup>a</sup> ± 5pp <sup>1</sup>                                                |                        |                            | ✓ |
|                                                      | 2015      | 57.6 | 52.6 | 62.6 | Maryland DH <sup>a</sup> ± 5pp <sup>1</sup>                                                |                        |                            | ✓ |
|                                                      | 2016      | 57.1 | 52.1 | 62.1 | Maryland DH <sup>a</sup> ± 5pp <sup>1</sup>                                                |                        |                            | ✓ |
|                                                      | 2017      | 59.9 | 54.7 | 64.9 | Maryland DH <sup>a</sup> ± 5pp <sup>1</sup>                                                |                        |                            | ✓ |
| Percentage of diagnosed white MSM in care            | 2012-2013 | 51.6 | 44.6 | 58.6 | Maryland DH <sup>a</sup> ± 5pp min-max for 2012-2013 <sup>1</sup>                          |                        | ✓                          |   |
|                                                      | 2014      | 54.5 | 49.5 | 59.5 | Maryland DH <sup>a</sup> ± 5pp <sup>1</sup>                                                |                        |                            | ✓ |
|                                                      | 2015      | 49.7 | 44.7 | 54.7 | Maryland DH <sup>a</sup> ± 5pp <sup>1</sup>                                                |                        |                            | ✓ |
|                                                      | 2016      | 51.5 | 46.5 | 56.5 | Maryland DH <sup>a</sup> ± 5pp <sup>1</sup>                                                |                        |                            | ✓ |
|                                                      | 2017      | 56.0 | 51.0 | 61.0 | Maryland DH <sup>a</sup> ± 5pp <sup>1</sup>                                                |                        |                            | ✓ |
| Percentage of diagnosed black MSM virally suppressed | 2012      | 31.6 | 26.6 | 36.6 | Maryland DH <sup>b</sup> ± 5pp <sup>1</sup>                                                |                        | ✓                          |   |
|                                                      | 2013      | 37.0 | 32.0 | 42.0 | Maryland DH <sup>b</sup> ± 5pp <sup>1</sup>                                                |                        | ✓                          |   |
|                                                      | 2014      | 46.0 | 41.0 | 51.0 | Maryland DH <sup>b</sup> ± 5pp <sup>1</sup>                                                |                        |                            | ✓ |
|                                                      | 2015      | 44.9 | 39.9 | 49.9 | Maryland DH <sup>b</sup> ± 5pp <sup>1</sup>                                                |                        |                            | ✓ |
|                                                      | 2016      | 46.3 | 41.3 | 51.3 | Maryland DH <sup>b</sup> ± 5pp <sup>1</sup>                                                |                        |                            | ✓ |
|                                                      | 2017      | 50.9 | 45.9 | 55.9 | Maryland DH <sup>b</sup> ± 5pp <sup>1</sup>                                                |                        |                            | ✓ |
| Percentage of diagnosed white MSM virally suppressed | 2012      | 35.1 | 30.1 | 40.1 | Maryland DH <sup>b</sup> ± 5pp <sup>1</sup>                                                |                        | ✓                          |   |
|                                                      | 2013      | 38.5 | 33.5 | 43.5 | Maryland DH <sup>b</sup> ± 5pp <sup>1</sup>                                                |                        | ✓                          |   |
|                                                      | 2014      | 51.2 | 46.2 | 56.2 | Maryland DH <sup>b</sup> ± 5pp <sup>1</sup>                                                |                        |                            | ✓ |
|                                                      | 2015      | 51.4 | 46.4 | 56.4 | Maryland DH <sup>b</sup> ± 5pp <sup>1</sup>                                                |                        |                            | ✓ |
|                                                      | 2016      | 50.5 | 45.5 | 55.5 | Maryland DH <sup>b</sup> ± 5pp <sup>1</sup>                                                |                        |                            | ✓ |
|                                                      | 2017      | 55.0 | 50.0 | 60.0 | Maryland DH <sup>b</sup> ± 5pp <sup>1</sup>                                                |                        |                            | ✓ |
| Percentage of MSM on ART virally suppressed          | 2010      | 85   | 75   | 90   | National estimates for MSM <sup>42,62</sup> range                                          | ✓                      | ✓                          |   |
| <b>PrEP coverage</b>                                 |           |      |      |      |                                                                                            | NHBS data              |                            |   |
| Percentage of all MSM taking PrEP                    | 2014      |      | 1.1  | 2.8  | Upper bound: NHBS data 2014, use in last 12 months <sup>10</sup> ; lower bound 40% of this | ✓                      |                            |   |
|                                                      | 2017      |      | 4.9  | 12.3 | Upper bound: NHBS data 2017, use in last 12 months <sup>11</sup> ; lower bound 40% of this | ✓                      |                            |   |

<sup>a</sup>definition of in care: percentage of those diagnosed with at least one CD4 test past 12 months

<sup>b</sup>definition of virally suppressed: percentage of those diagnosed with at least one viral load test last 12 months and most recent viral load <200 copies/ml

# Model Fits to Data

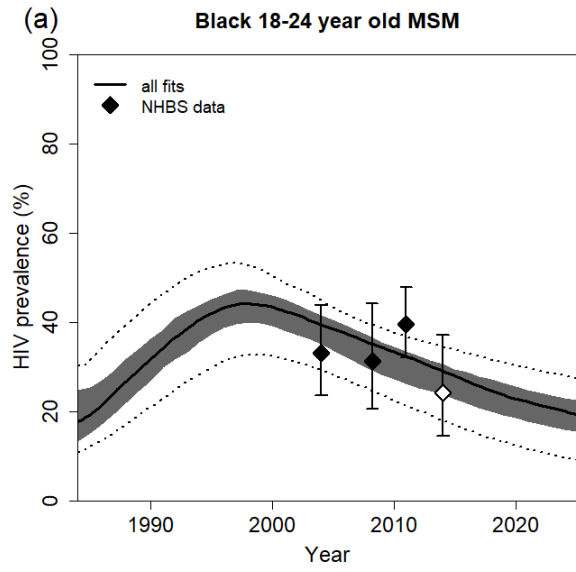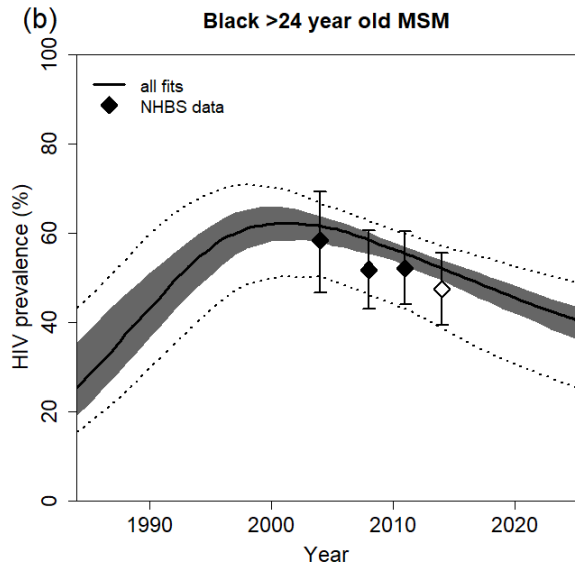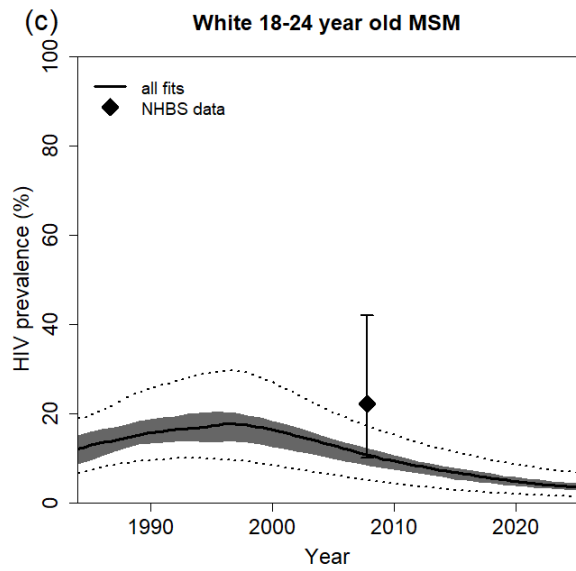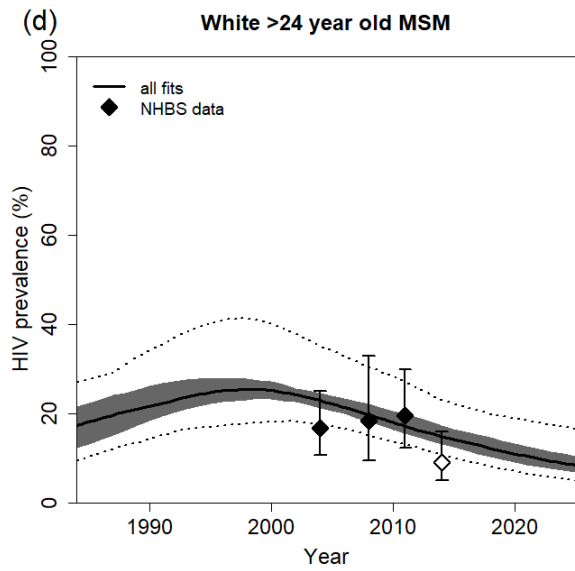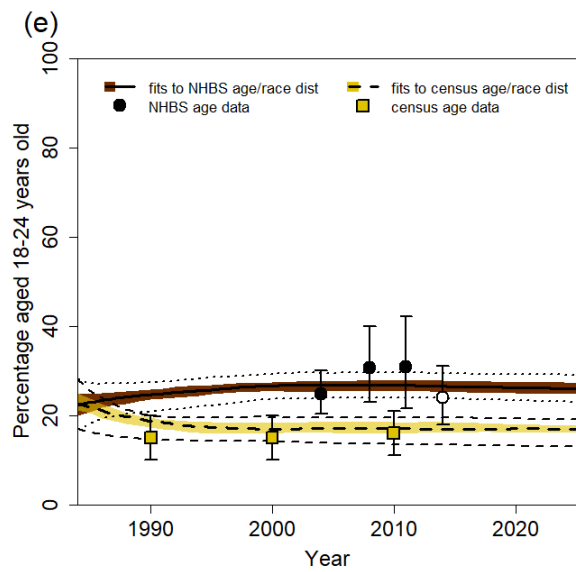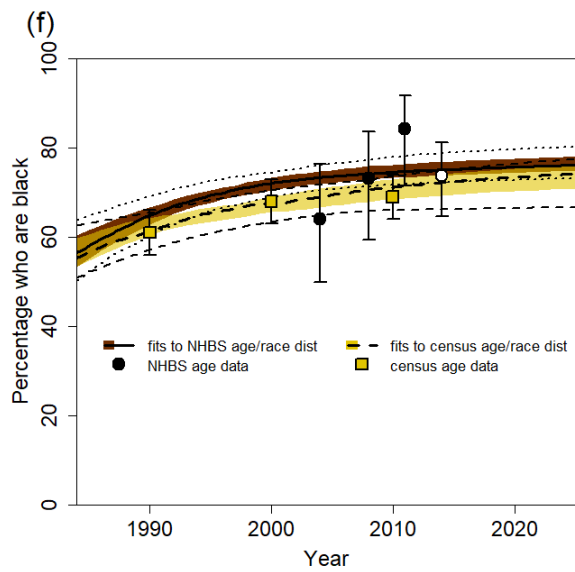



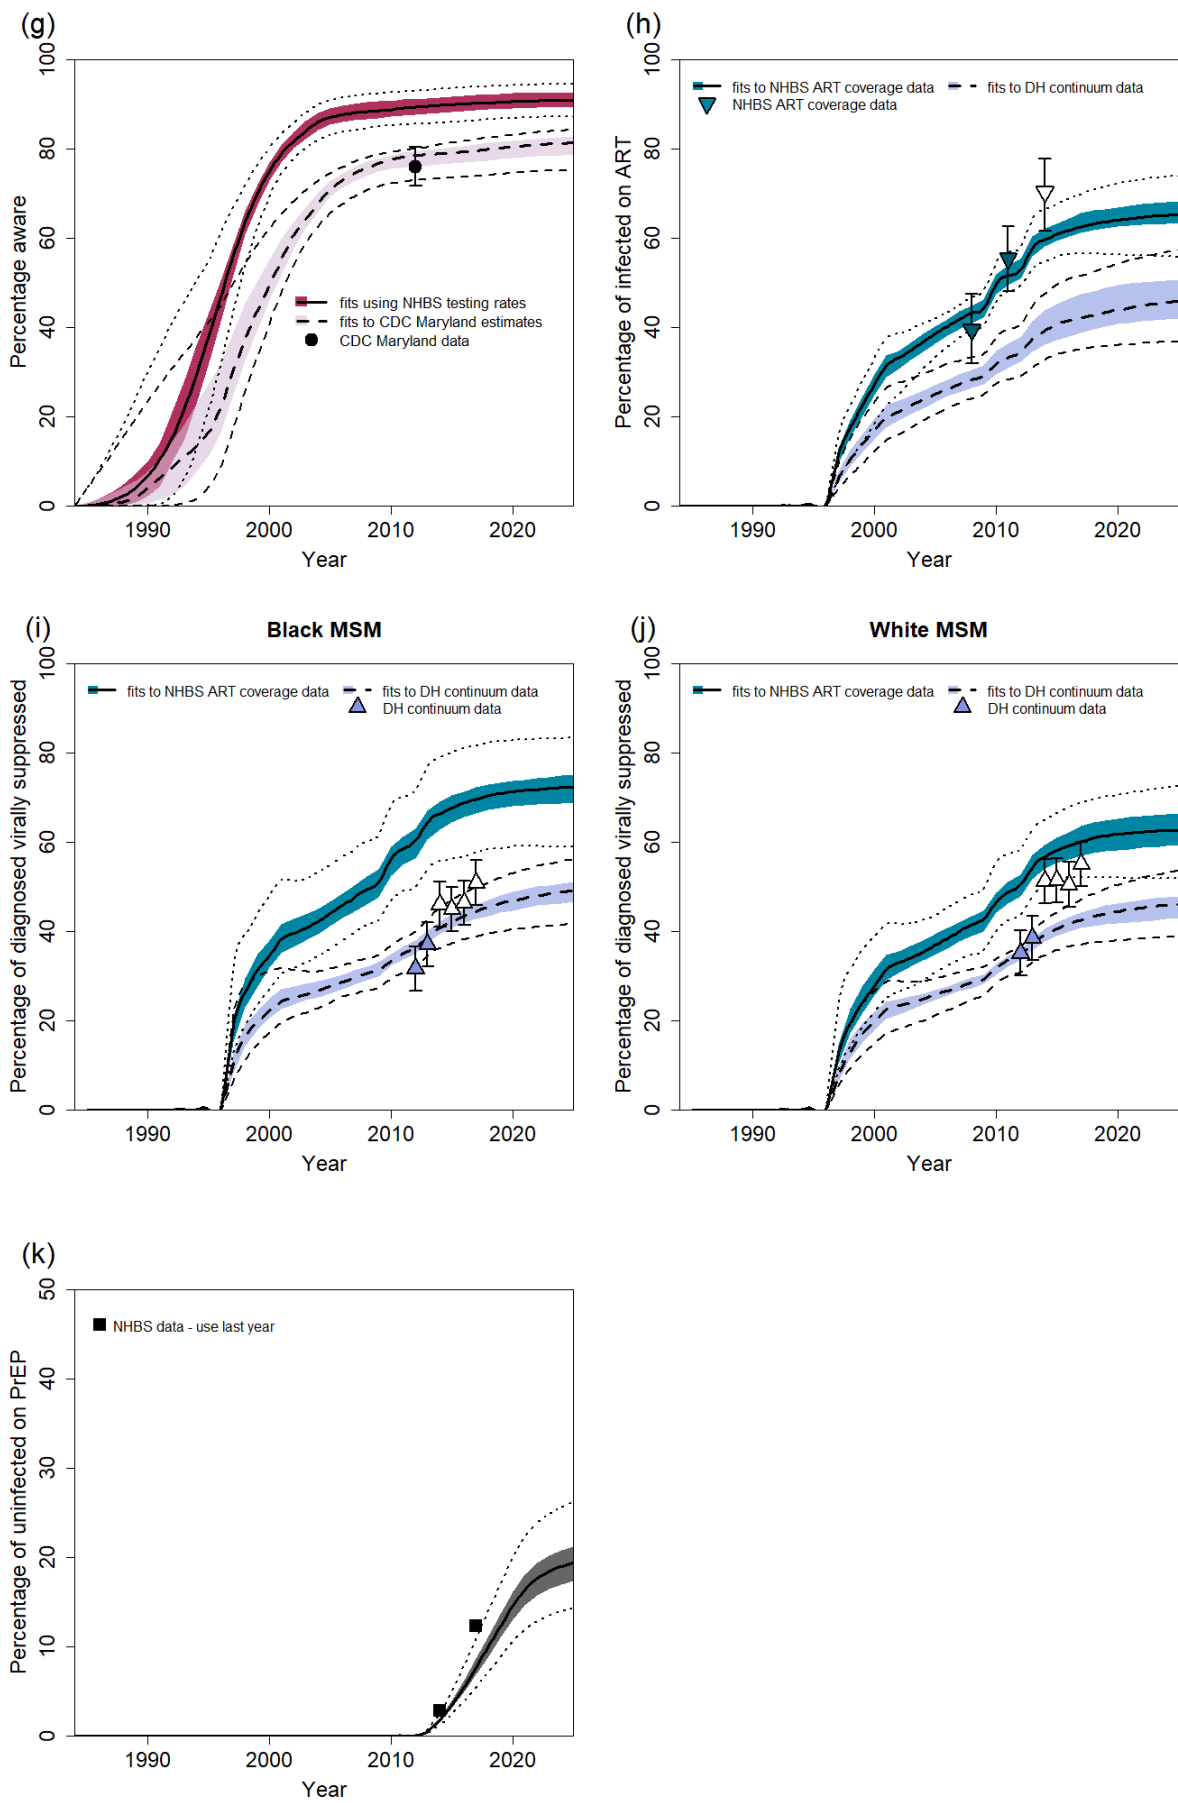

**Figure S4. Model fits to available data for MSM in Baltimore.** (a-d) HIV prevalence among young (18-24 year old) black/older (>24 year old) black/young white/older white MSM, (e) percentage of all MSM aged 18-24 years old, (f)

percentage of MSM who are black, (g) percentage of HIV-positive MSM who are aware of their HIV-positive status, (h) percentage of all HIV-positive MSM who are on ART, (i) percentage of black diagnosed HIV-positive MSM who are virally suppressed, (j) percentage of white diagnosed HIV-positive MSM who are virally suppressed, (k) percentage of uninfected MSM who are taking PrEP. Results are for all 169 fitting parameter combinations. Results show median (thick lines), 25<sup>th</sup>-75<sup>th</sup> percentile (dark shaded area), and 2.5<sup>th</sup> and 97.5<sup>th</sup> percentiles (dotted lines) across model fits. Points and error bars show the mean and 95% CI for National HIV Behavioural Surveillance (NHBS) data (a-f,h), mean and  $\pm 5$  percentage points for census data (e,f) and DH continuum data (i,j), or mean for NHBS data (k). Data prior to 2014 (filled points) were used for model fitting. Data from 2014 (unfilled points) were used to validate model predictions. Number of fits under each assumption: demography fitting assumptions, NHBS age/race distribution (N=146), census age/race distribution (N=23); diagnosis fitting assumptions, NHBS HIV testing rate parameter (N=118), CDC estimates for Maryland (N=51); continuum fitting assumptions, NHBS ART coverage data (N= 101), DH continuum data (N= 68).

## Table - Disruptions

**Table S3: Magnitude of disruptions modelled, with source and justification**

| Disruption to:      | Overall data-driven reduction used in main scenario | Age- and/or race-specific reductions used in main scenario                                             | Overall values explored in sensitivity analysis (age-/race-specific estimates adjusted proportionately) | Source/justification                                                                                                                                                                                                                                                                                                                                                                                                                                                                                                                                                                                                                                                                                                                                                                                                                                     |
|---------------------|-----------------------------------------------------|--------------------------------------------------------------------------------------------------------|---------------------------------------------------------------------------------------------------------|----------------------------------------------------------------------------------------------------------------------------------------------------------------------------------------------------------------------------------------------------------------------------------------------------------------------------------------------------------------------------------------------------------------------------------------------------------------------------------------------------------------------------------------------------------------------------------------------------------------------------------------------------------------------------------------------------------------------------------------------------------------------------------------------------------------------------------------------------------|
| HIV testing         | 20%                                                 | 18-24-year-olds: 25%<br>≥25-year-olds: 19%                                                             | 50%, 75%, 100%                                                                                          | Main estimate from Sanchez et al survey of US MSM. <sup>63</sup> 18.8% report decreased access to HIV testing; 18.1% (52/286) of those who tried to get an HIV test had trouble getting one. Consistent with data from Stephenson et al survey of US MSM <sup>64</sup> : 32.2% reported that COVID-19 prevented them from getting a test for HIV. Age-specific reductions based on ratios from Sanchez et al <sup>63</sup>                                                                                                                                                                                                                                                                                                                                                                                                                               |
| ART initiations     | 50%                                                 | ..                                                                                                     | 50%, 75%, 100%                                                                                          | Assumption (no data found)                                                                                                                                                                                                                                                                                                                                                                                                                                                                                                                                                                                                                                                                                                                                                                                                                               |
| Viral suppression   | 10%                                                 | White: 9%<br>Black: 15%                                                                                | 10%, 25%, 50%                                                                                           | Main estimate from Sanchez et al survey of US MSM. <sup>63</sup> Of those living with HIV, 24% report having fewer viral load or other lab tests, 6% report reduced access to ART medications, 9.5% (10/105) of those who've tried to get an ART prescription report trouble getting one, 5% report that they are taking their medications daily less often. Race-specific reduction based upon data from Santos et al global survey of MSM, <sup>65</sup> using ratio for those identifying as racial minority vs. not racial minority in % who either cannot refill/access ART or can refill/access ART with complications. <sup>65</sup>                                                                                                                                                                                                              |
| PrEP initiations    | 72%                                                 | ..                                                                                                     | 50%, 75%, 100%                                                                                          | Krakower et al study at a Boston PrEP clinic. <sup>66</sup> 72% reduction in PrEP initiations in April 2020 vs January 2020.                                                                                                                                                                                                                                                                                                                                                                                                                                                                                                                                                                                                                                                                                                                             |
| PrEP adherence      | 9%                                                  | Black 18-24-yr-olds: 13%<br>White 18-24-yr-olds: 11%<br>Black ≥25-yr-olds: 9%<br>White ≥25-yr-olds: 8% | 10%, 25%, 50%                                                                                           | Krakower et al study at a Boston PrEP clinic <sup>66</sup> : 9.2% excess PrEP lapses in April 2020 vs January 2020; in January, 4.4% (140/3197) lapsed, in April 13.6% (407/2984) lapsed. Sanchez et al survey of US MSM <sup>63</sup> : 12.9% (18/158) of those who tried to get a PrEP prescription had trouble getting one, and 8% (12/150) of those who tried to get PrEP medication had trouble getting it. Stephenson et al survey of US MSM <sup>64</sup> : 8.9% report that COVID-19 has prevented access to a PrEP prescription. Age and race differences estimated from ratios of % lapsed by age and race during lockdown at a Boston PrEP clinic <sup>66</sup> : 18.0% of under-26 years-olds and 12.6% of 27+ year-olds had a PrEP lapse in April 2020; 14.2% of Black patients and 12.4% of White patients had a PrEP lapse in April 2020. |
| HIV testing on PrEP | 85%                                                 | ..                                                                                                     | 50%, 75%, 100%                                                                                          | Krakower et al study at a Boston PrEP clinic. <sup>66</sup> 85% reduction in number of HIV tests among those on PrEP in April 2020 vs January 2020.                                                                                                                                                                                                                                                                                                                                                                                                                                                                                                                                                                                                                                                                                                      |
| Condom use          | 5%                                                  | ..                                                                                                     | 10%, 25%, 50%                                                                                           | Sanchez et al survey of US MSM. <sup>63</sup> 5.4% reported less condom use, 0.8% reported more condom use. N.B. Small differences in condom use by age reported by Sanchez et al <sup>63</sup> not explored as the model does not allow for condom use differing by age.                                                                                                                                                                                                                                                                                                                                                                                                                                                                                                                                                                                |
| Partner numbers     | 0%, 25%, 50%                                        | 18-24-year olds: 0%, 22%, 44%<br>≥25-year-olds: 0%, 26%, 52%                                           | 10%, 25%, 50%                                                                                           | Starks et al survey of US MSM <sup>67</sup> : no significant change in reported number of casual sex partners pre-COVID to during COVID-19. Stephenson et al survey of US MSM <sup>64</sup> : very small difference (0.1) in number of unprotected anal sex partners in 3 months prior to COVID-19 and during COVID-19. Sanchez et al survey of US MSM <sup>63</sup> 51.3% reported having fewer sex partners, 0.8% reported having more. McKay et al survey of US MSM <sup>68</sup> 39.3% reported having fewer sex partners. As those reporting fewer partners may still have sexual partners, we explored overall reductions in numbers of all types of sexual partners combined of 25% and 50% (equivalent to 50% and 100% reduction among 50% of MSM). Age-specific reductions based on ratios from Sanchez et al. <sup>63</sup>                    |

Supplementary Results

(a)

6 month disruption: impact on new infections

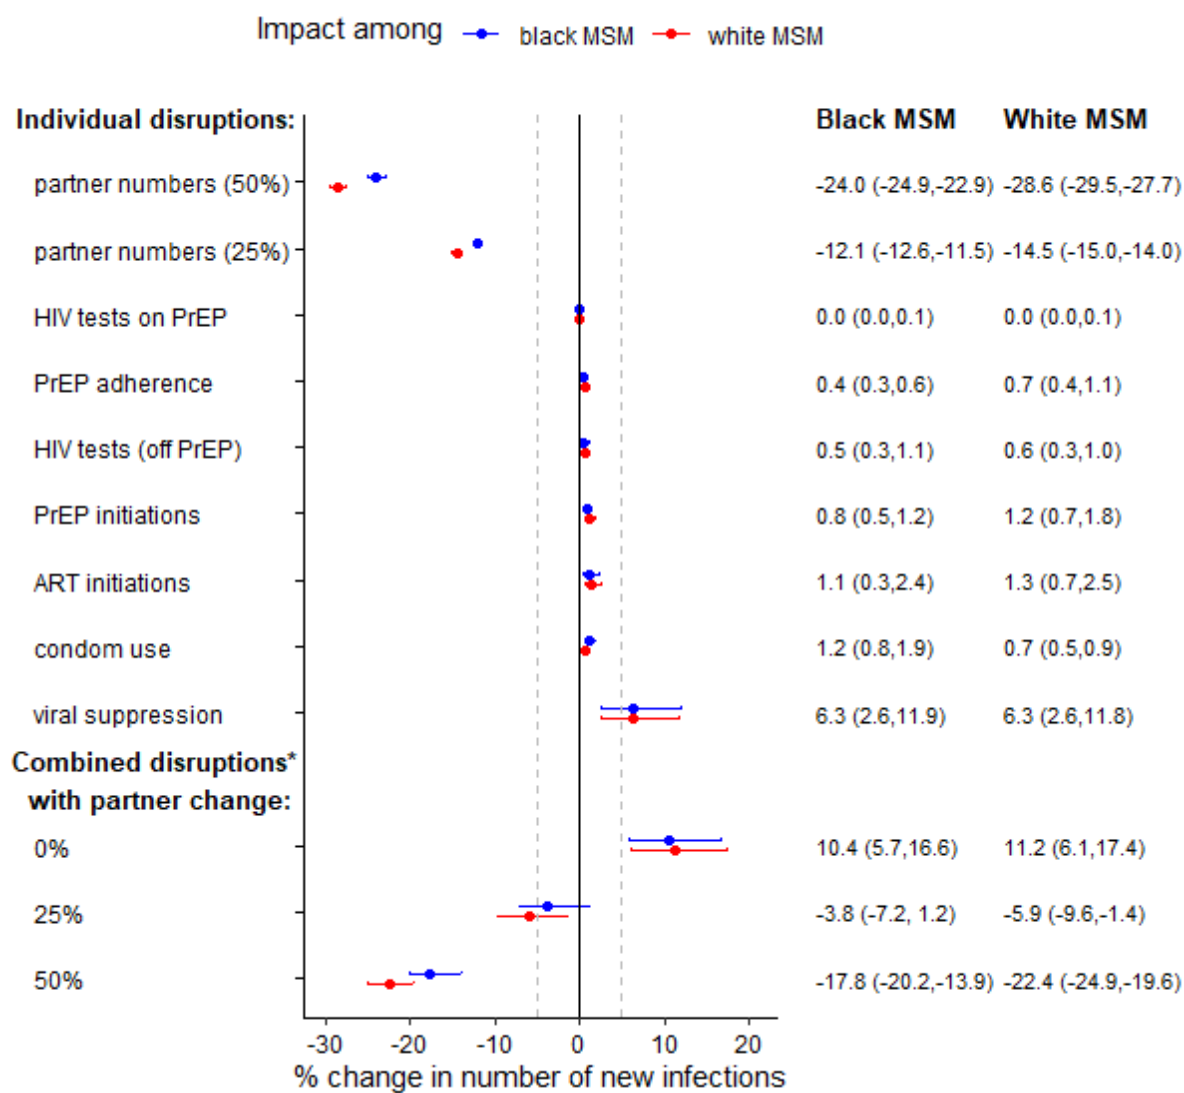

(b)

### 6 month disruption: impact on HIV-related deaths

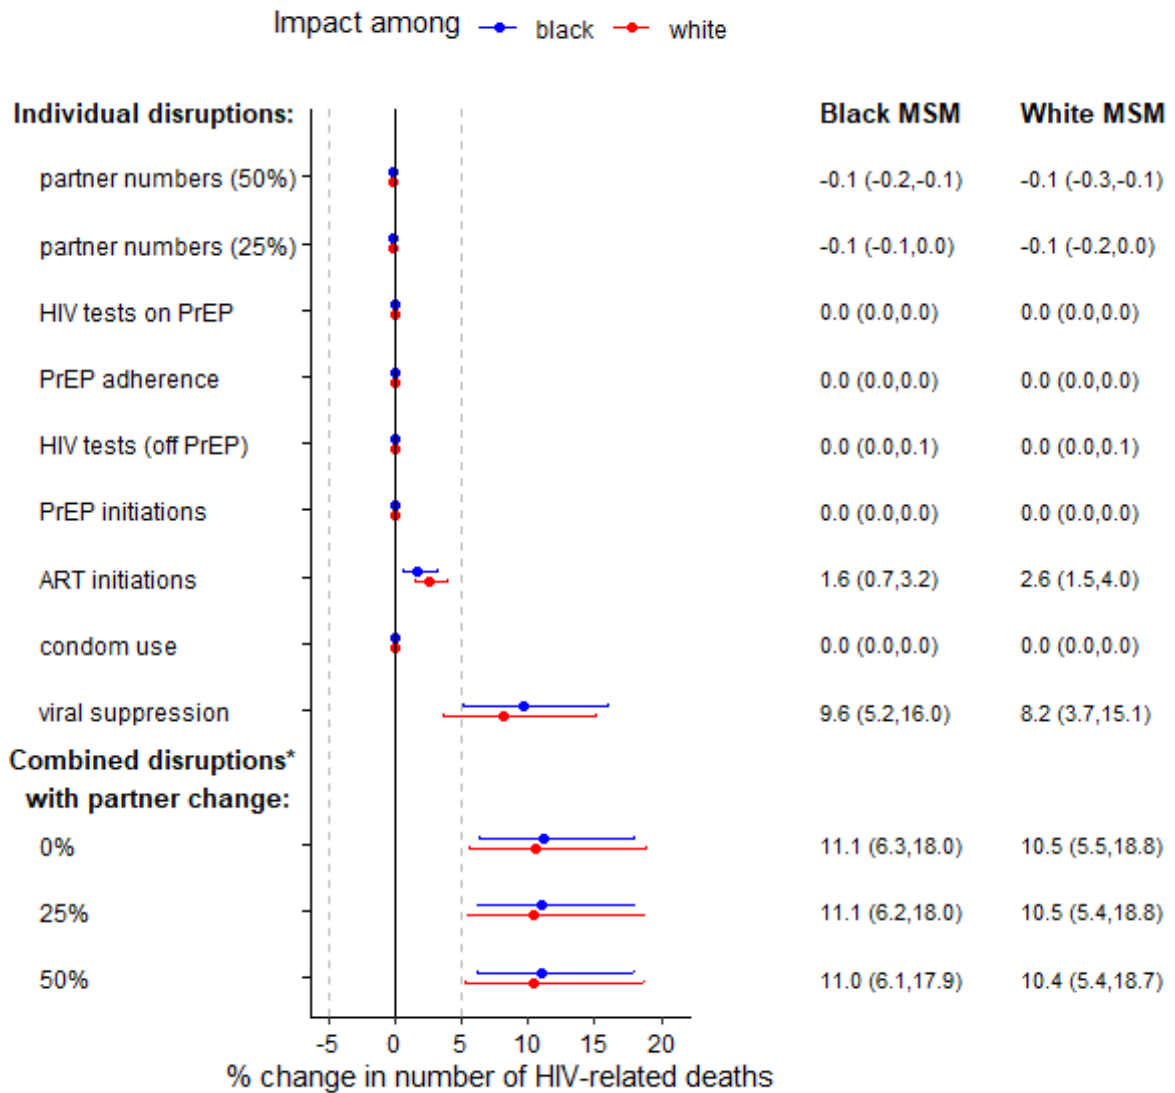

**Figure S5: Impact of 6-month individual and combined estimated disruptions due to COVID-19, by race.**

Estimated disruptions are based on available data (see Table 2, Table S3 (p26) for details). Impact on (a) cumulative new HIV infections and (b) cumulative HIV-related deaths, over 1 year, among Black MSM (blue points) and White MSM (red points). Points are median and error bars are 95% credible intervals across all model fits. Disruptions are assumed to last for 6 months. Individual overall disruption magnitudes are: 20% reduction in HIV tests, 5% reduction in condom use, 72% reduction in PrEP initiations, 9% reduction in PrEP adherence, 85% reduction in HIV testing on PrEP, 50% reduction in new ART initiations and 10% reduction in viral suppression (see Table 2 for age- and race-specific disruptions). \*Combined disruption consists of 20% reduction in HIV tests, 5% reduction in condom use, 72% reduction in PrEP initiations, 9% reduction in PrEP adherence, 85% reduction in HIV testing on PrEP, 50% reduction in new ART initiations and 10% reduction in viral suppression. Dashed vertical lines are at -5% and 5%.

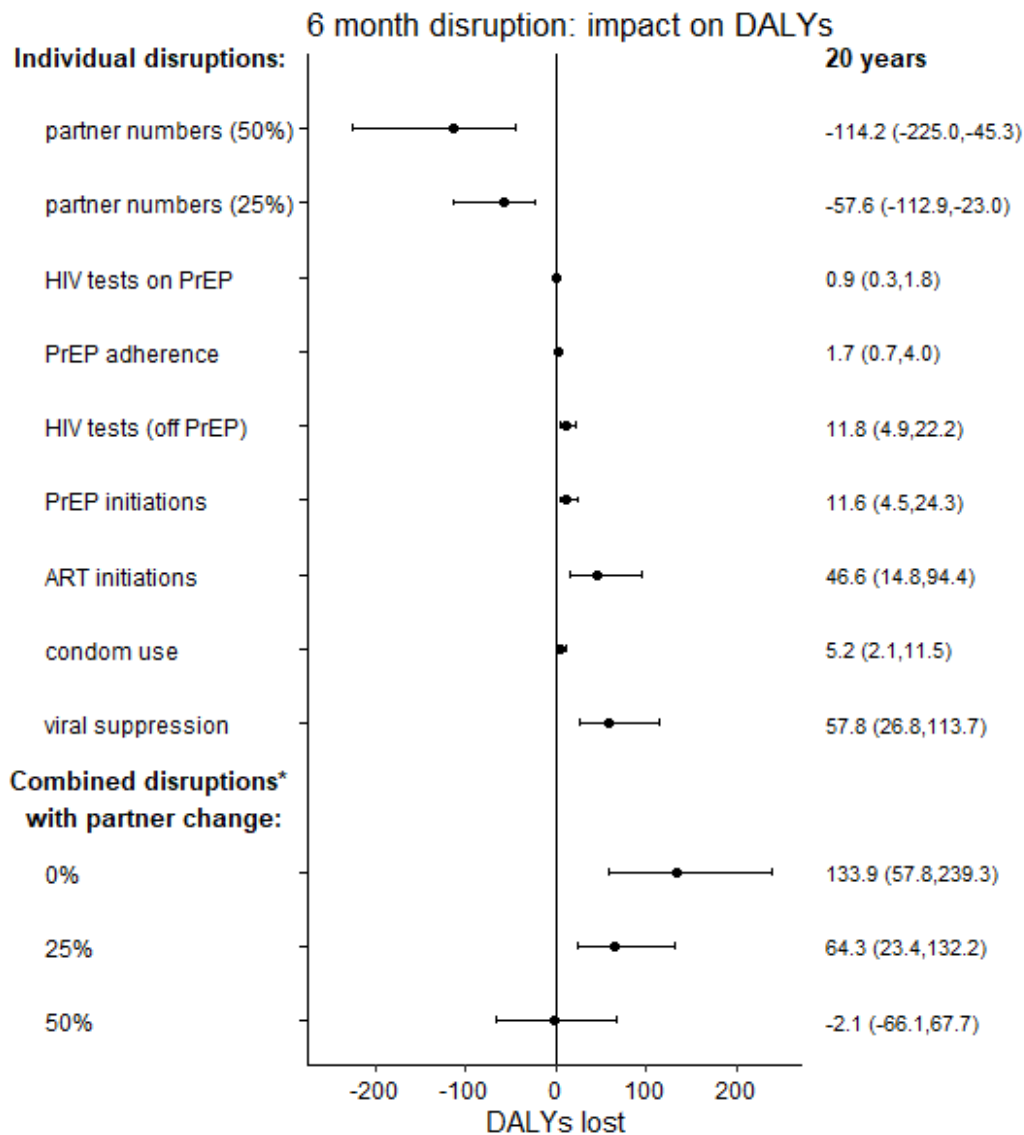

**Figure S6: Impact of 6-month individual and combined estimated disruptions due to COVID-19 on cumulative DALYs lost over 20 years.** Estimated disruptions are based on available data (see Table 2, Table S3 (p26) for details). Points are median and error bars are 95% credible intervals across all model fits. Disruptions are assumed to last for 6 months. Individual overall disruption magnitudes are: 20% reduction in HIV tests, 5% reduction in condom use, 72% reduction in PrEP initiations, 9% reduction in PrEP adherence, 85% reduction in HIV testing on PrEP, 50% reduction in new ART initiations and 10% reduction in viral suppression (see Table 2 for age- and race-specific disruptions). \*Combined disruption consists of 20% reduction in HIV tests, 5% reduction in condom use, 72% reduction in PrEP initiations, 9% reduction in PrEP adherence, 85% reduction in HIV testing on PrEP, 50% reduction in new ART initiations and 10% reduction in viral suppression.

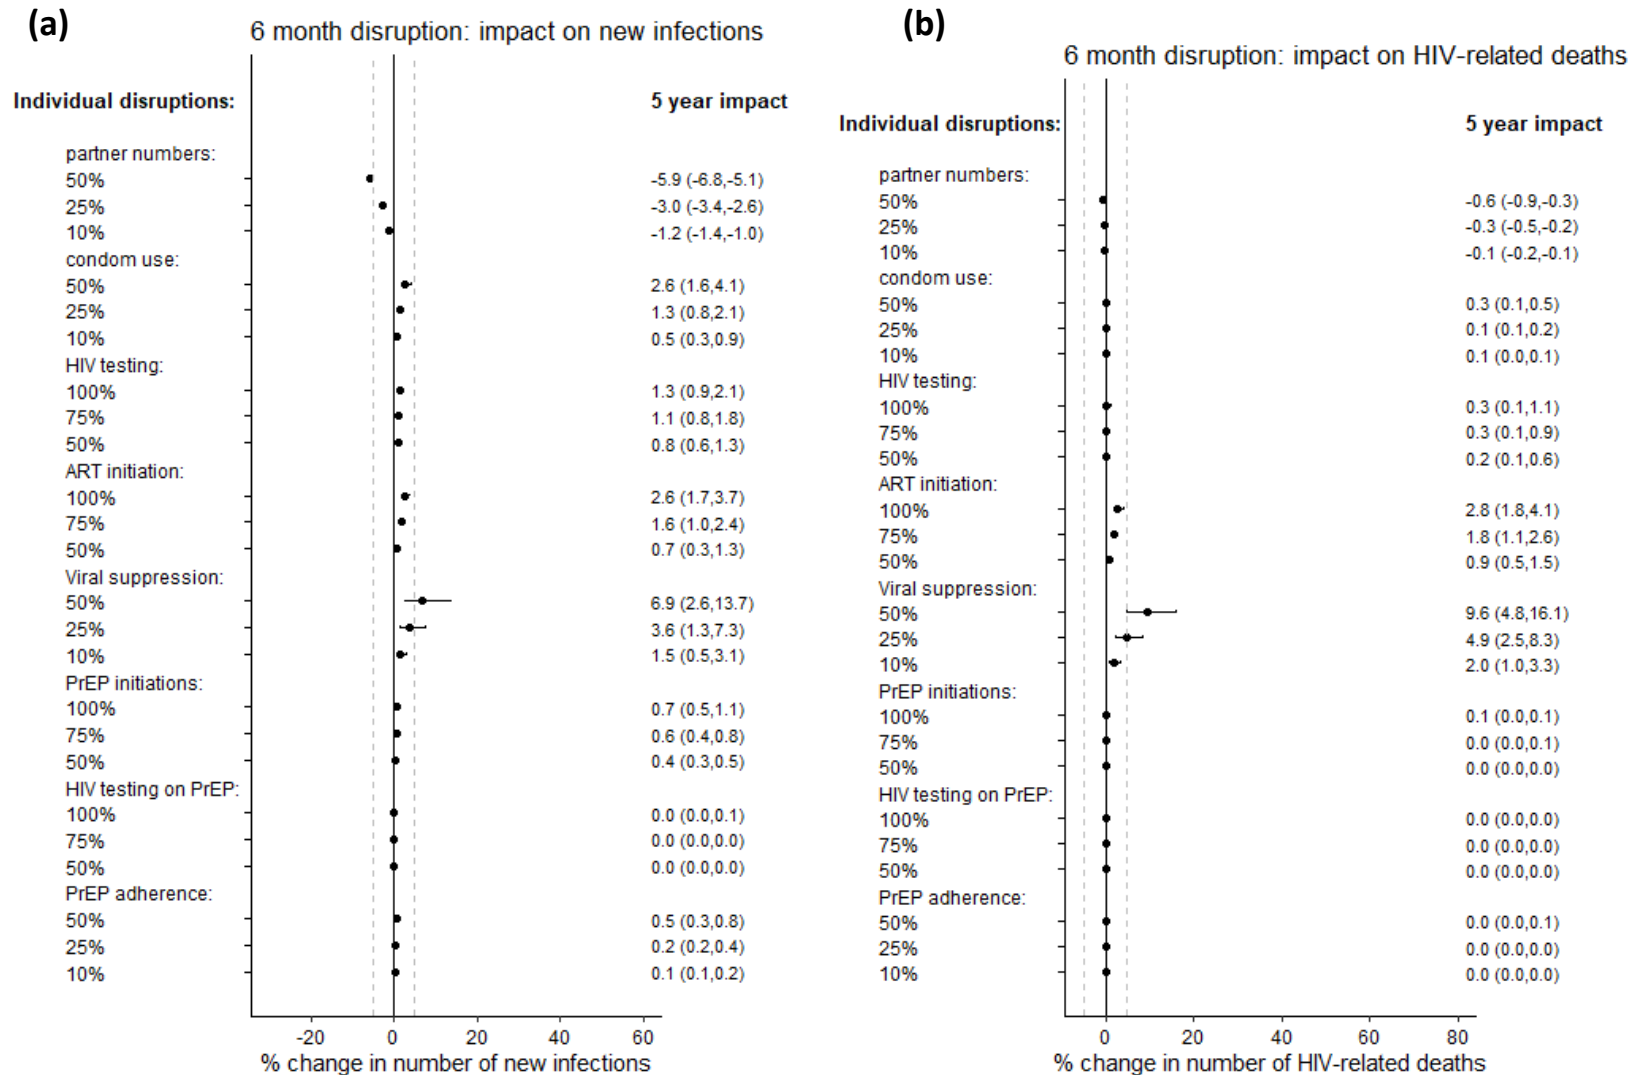

**Figure S7: Sensitivity analysis on disruption magnitude - 5-year impact.** Impact of individual disruptions due to COVID-19, exploring different values for the size of these disruptions, indicated on plot. Impact on (a) cumulative new HIV infections and (b) cumulative HIV-related deaths, over 5 years. Points are median and error bars are 95% credible intervals across all model fits. Disruptions are assumed to last for 6 months. Dashed vertical lines are at -5% and 5% .

### 6 month disruption: impact on DALYs

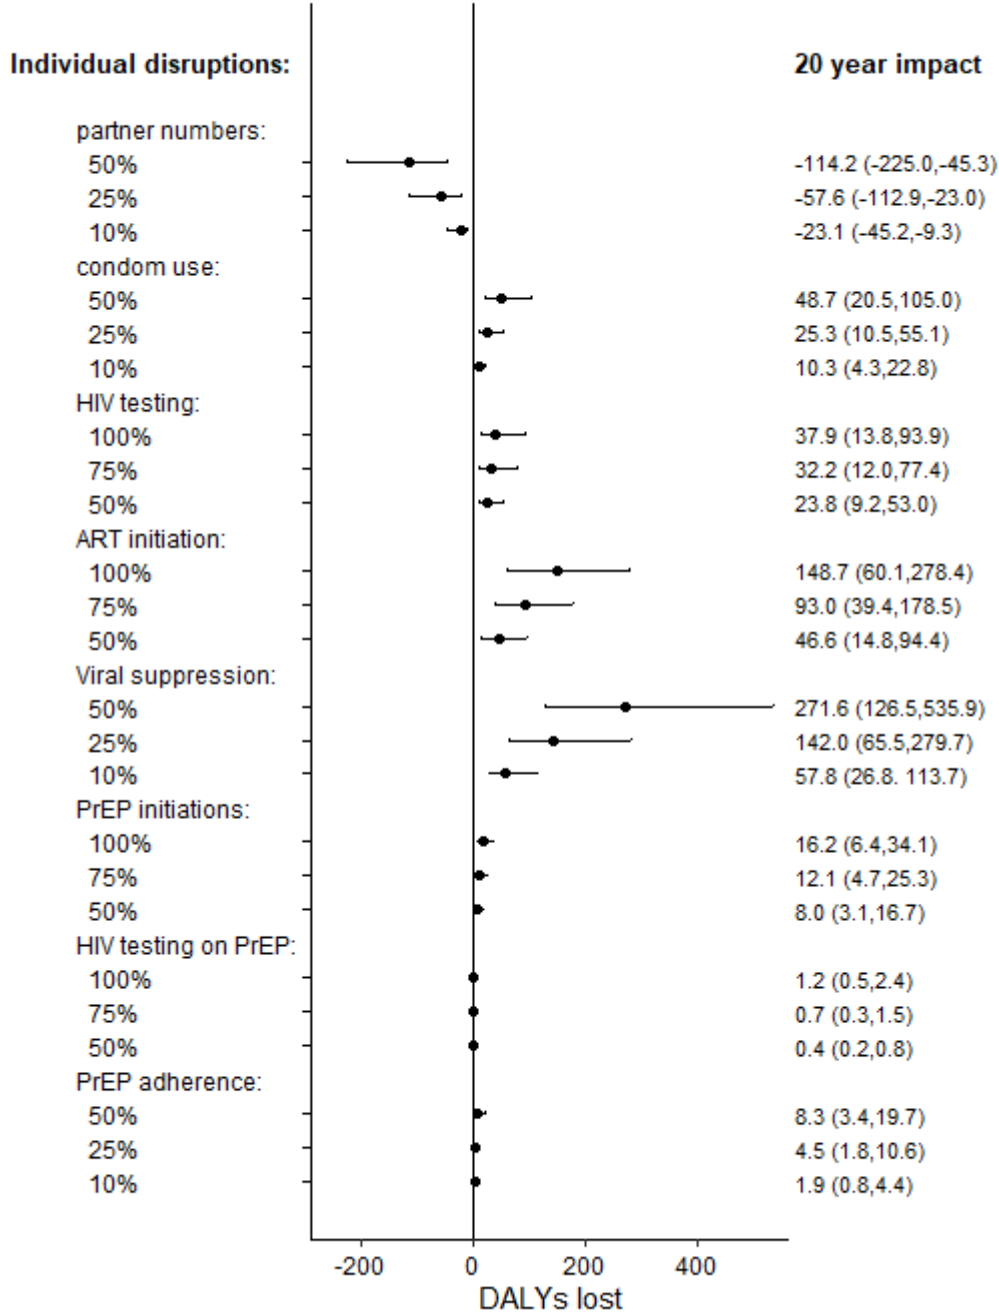

**Figure S8. Sensitivity analysis on disruption magnitude: impact on cumulative DALYs lost over 20 years.** Impact of individual disruptions due to COVID-19, exploring different values for the size of these disruptions, indicated on plot. Points are median and error bars are 95% credible intervals across all model fits. Disruptions are assumed to last for 6 months.



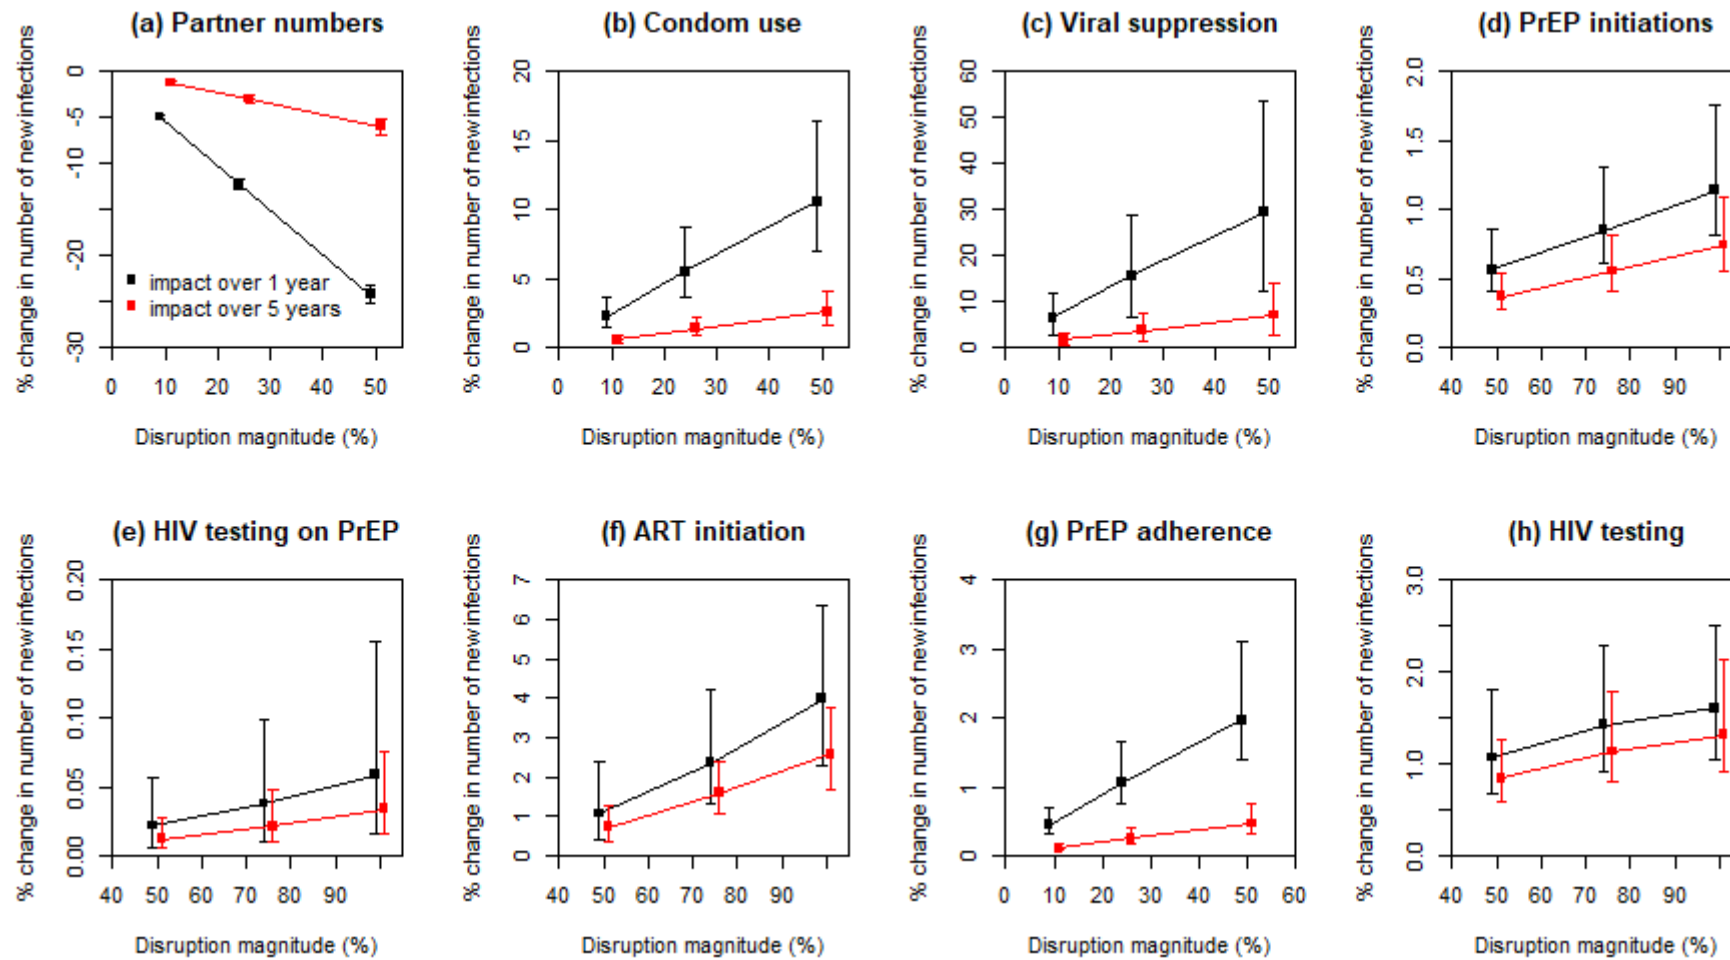

**Figure S9: Sensitivity analysis on disruption magnitude: impact on new HIV infections.** Impact of individual disruptions due to COVID-19, exploring different values for the size of these disruptions, indicated on plot. Impact on cumulative new HIV infections over 1 year (black points) and 5 years (red points). Points are median and error bars are 95% credible intervals across all model fits. Disruptions are assumed to last for 6 months.

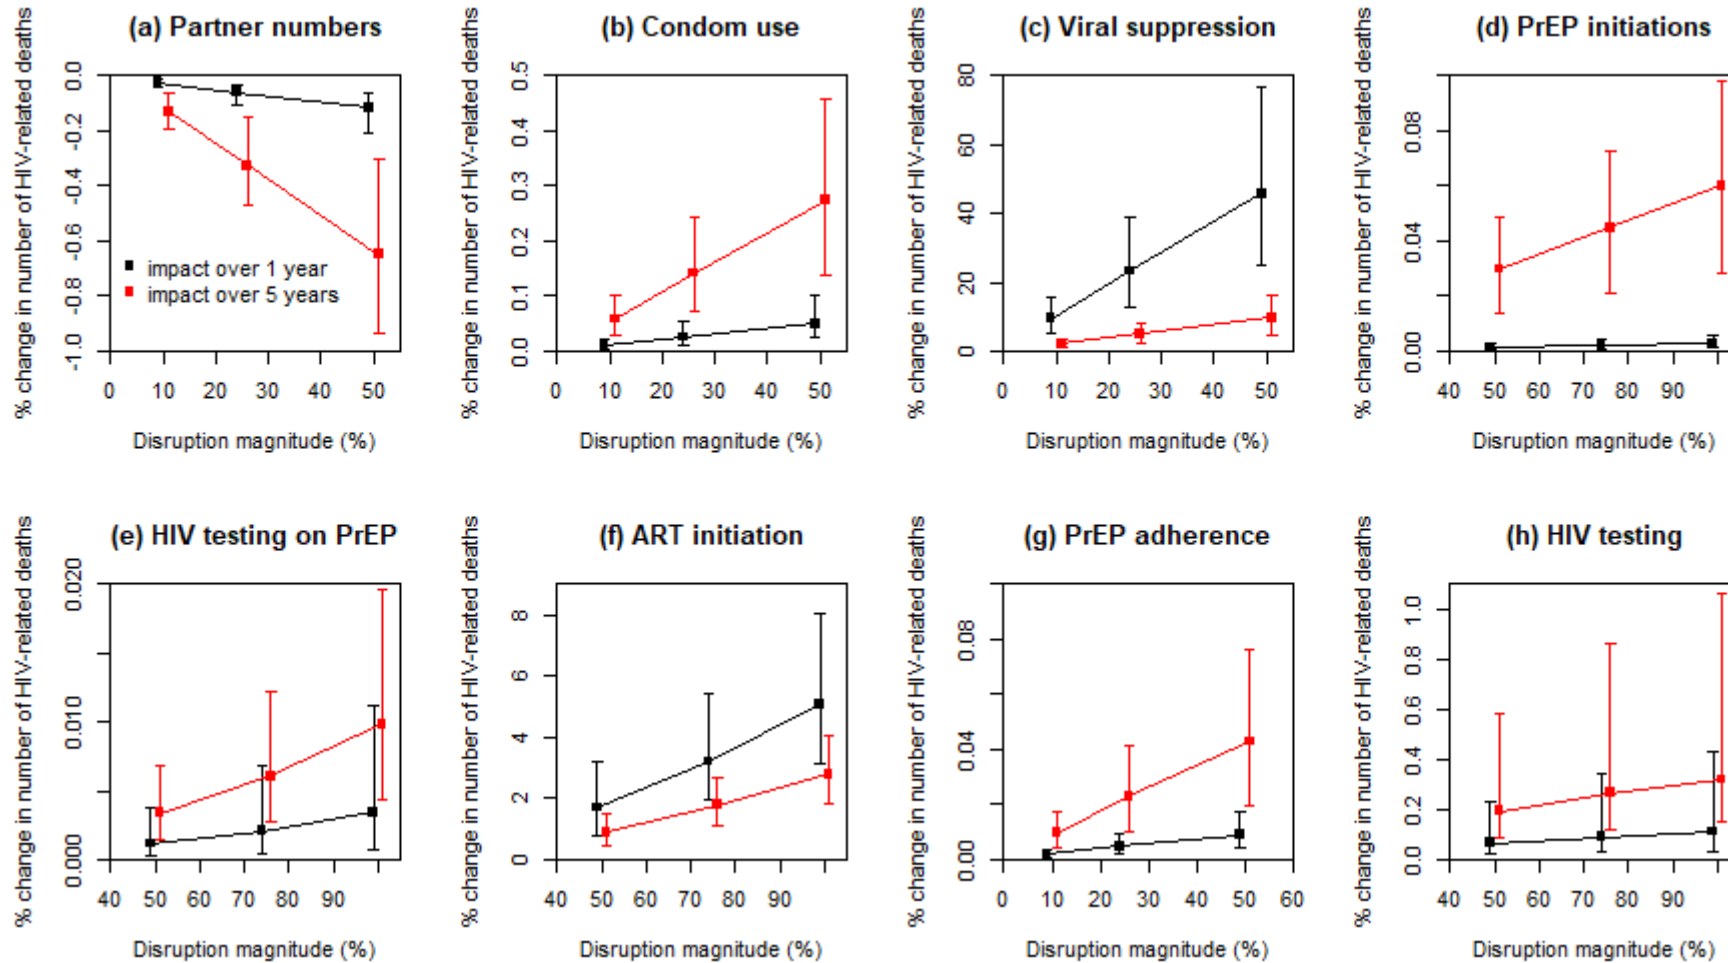

**Figure S10: Sensitivity analysis on disruption magnitude: impact on HIV-related deaths.** Impact of individual disruptions due to COVID-19, exploring different values for the size of these disruptions, indicated on plot. Impact on HIV-related deaths over 1 year (black points) and 5 years (red points). Points are median and error bars are 95% credible intervals across all model fits. Disruptions are assumed to last for 6 months.

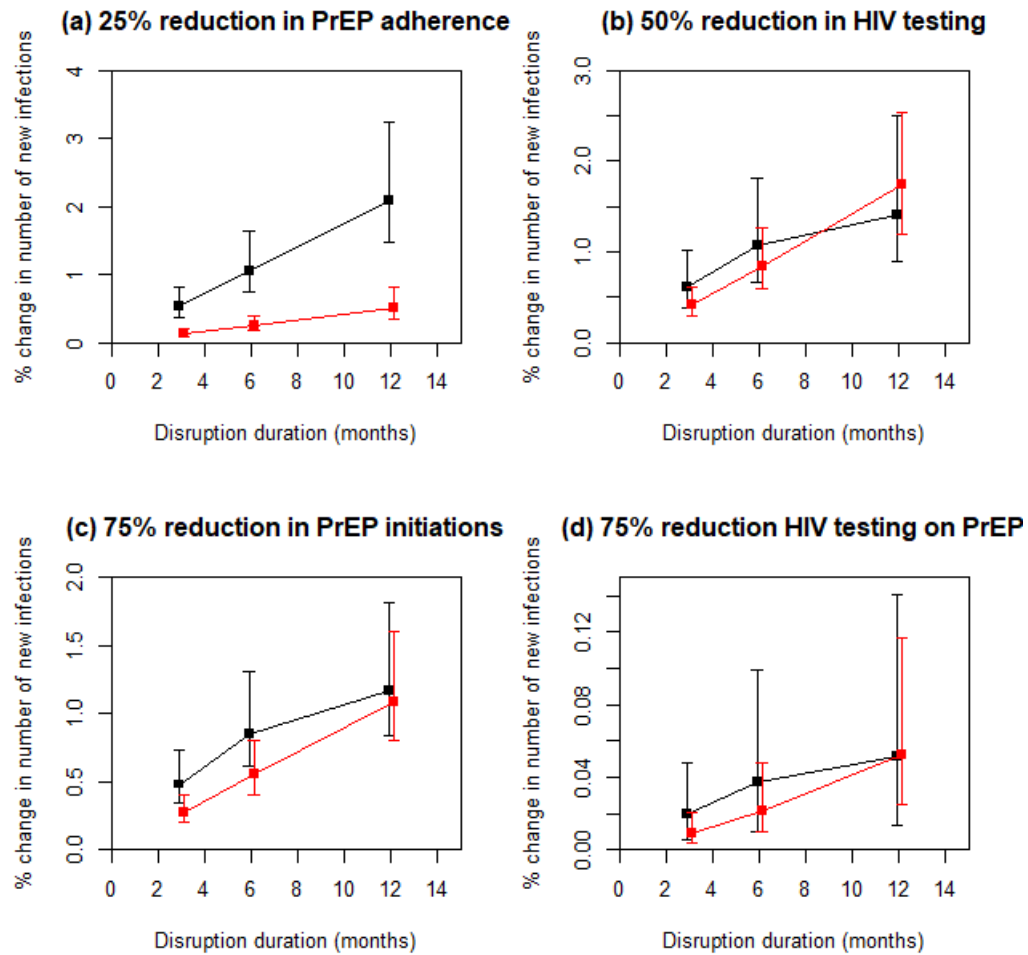

**Figure S11: Sensitivity analysis on disruption duration.** Impact on cumulative new HIV infections over 1 year (black points) and 5 years (red points), for disruptions indicated, over 3, 6 and 12 months. Points are median and error bars are 95% credible intervals across all model fits. Note different y-axis scales used to clearly show linearity of trends.

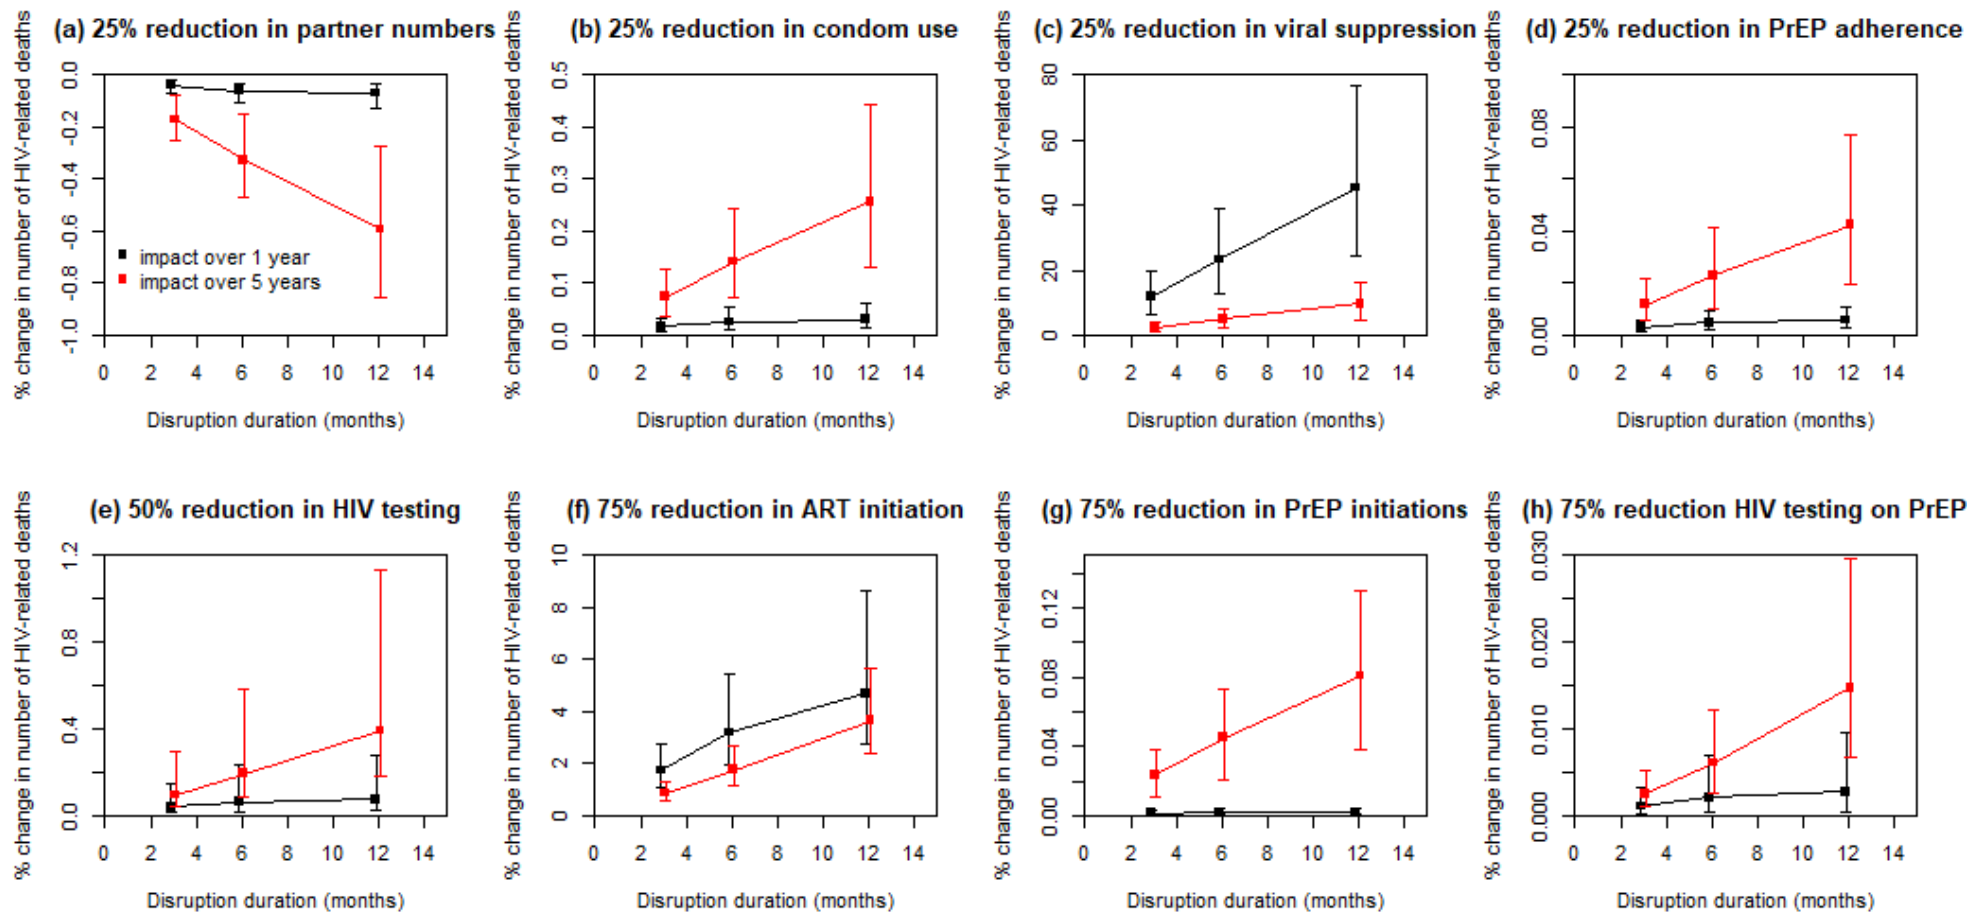

**Figure S12. Impact of disruptions lasting 3, 6 or 12 months on HIV-related deaths.** Impact on cumulative HIV-related deaths over 1 year (black points) and 5 years (red points), for disruptions indicated. Points are median and error bars are 95% credible intervals across all model fits. Note very different y-axis scales used to clearly show linearity of trends.

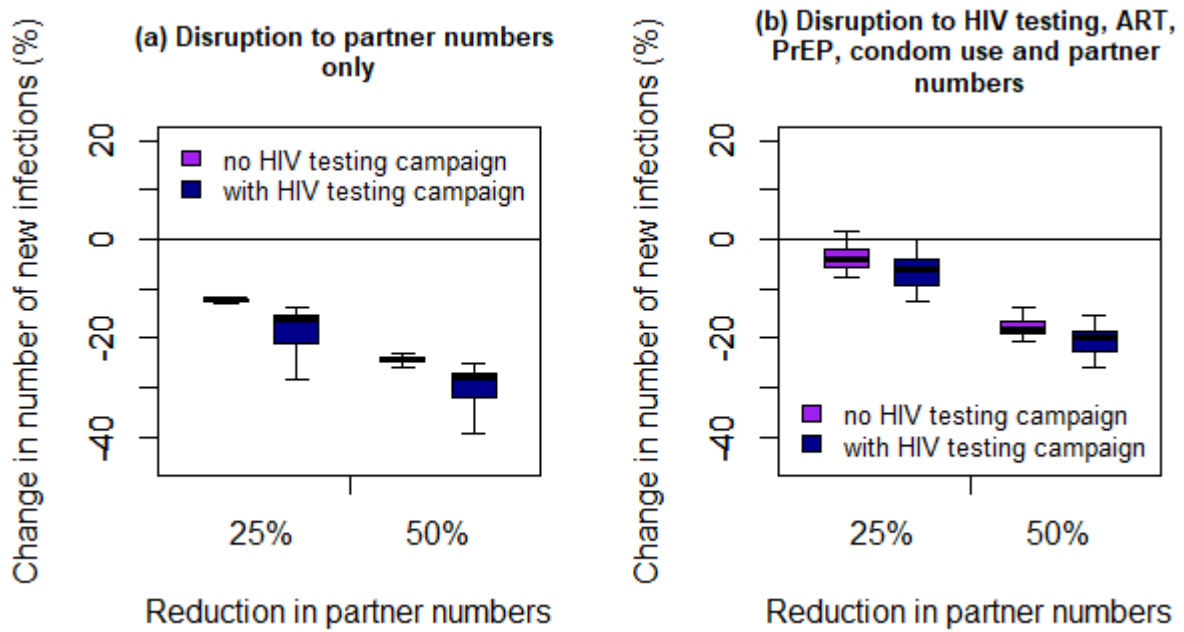

**Figure S13: Impact of disruptions with and without additional HIV testing campaign, over 1 year.** Impact on cumulative new HIV infections over one year of six-month disruptions to (a) partner numbers only or (b) HIV testing, ART initiation, viral suppression, PrEP initiation and continuation and condom use as well as partner numbers, with (dark blue bars) or without (purple bars) an additional HIV testing campaign reaching 90% of MSM for HIV testing during the six-month disruption. Panels show the impacts relative to the base case scenario, with no COVID. For the full disruption (b), we modelled a 20% reduction in HIV tests (in the absence of the HIV testing campaign), 5% reduction in condom use, 72% reduction in PrEP initiations, 9% reduction in PrEP adherence, 85% reduction in HIV testing on PrEP, 50% reduction in new ART initiations and 10% reduction in viral suppression (see Table 2 for age- and race-specific disruptions). Thick lines are median, boxes are interquartile range, and whiskers full range across all model fits.

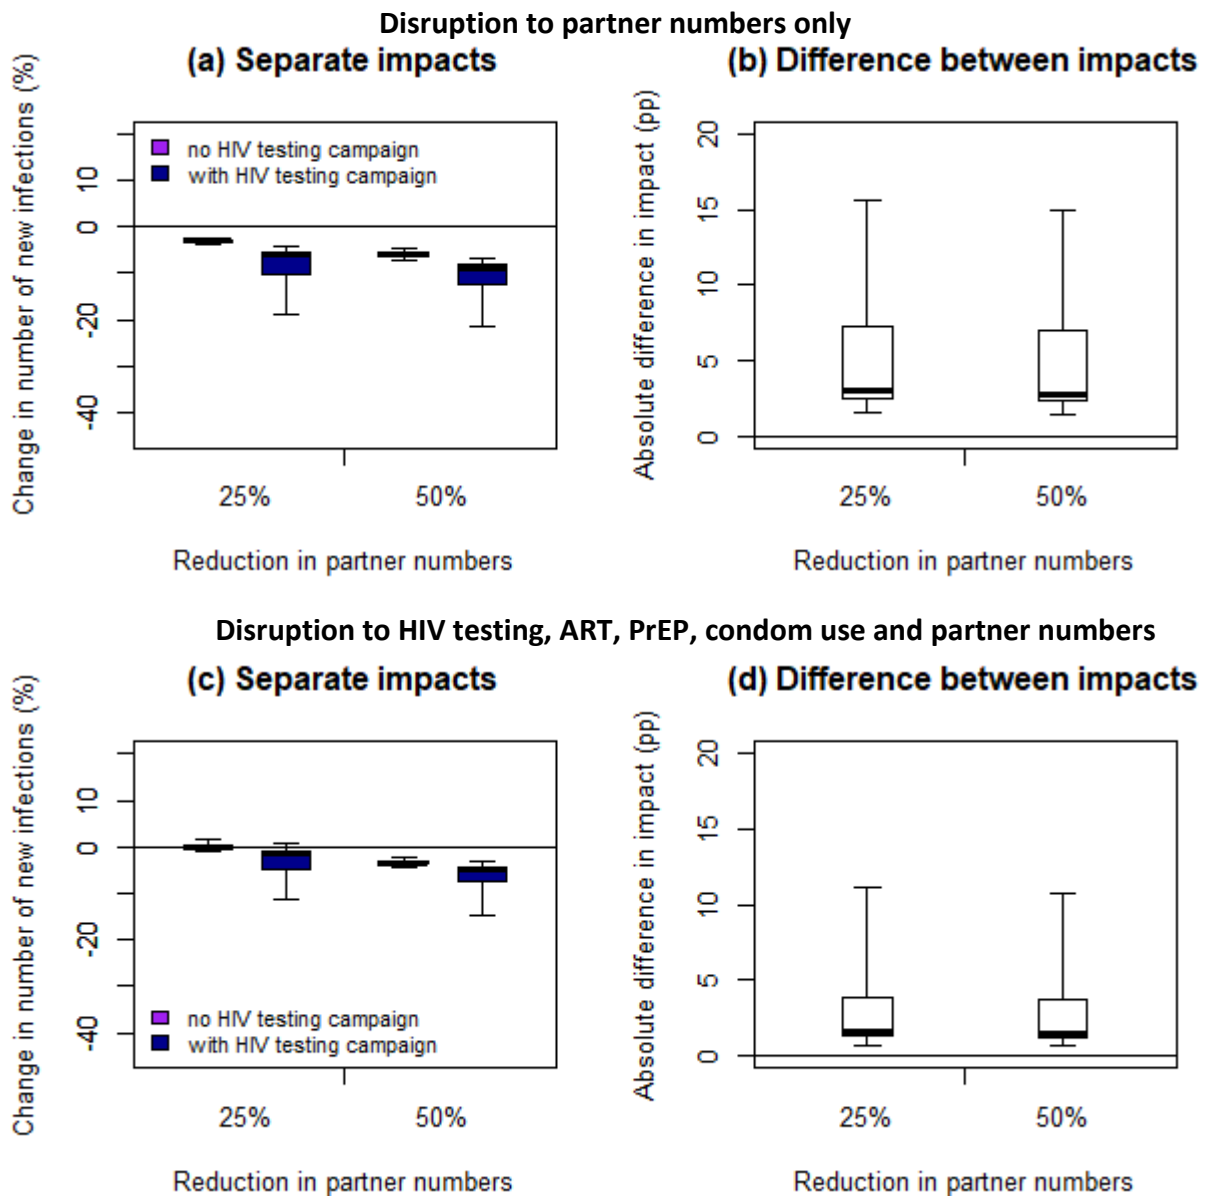

**Figure S14. Impact of disruptions with and without additional HIV testing campaign, measured over 5 years.** Impact on cumulative new HIV infections over five years of six-month disruptions to (a,b) partner numbers only or (c,d) HIV testing, ART initiation, viral suppression, PrEP initiation and continuation and condom use as well as partner numbers, with (dark blue bars) or without (purple bars) an additional HIV testing campaign reaching 90% of MSM for HIV testing during the six-month disruption. For the full disruption (c,d), 20% reduction in HIV tests, 5% reduction in condom use, 72% reduction in PrEP initiations, 9% reduction in PrEP adherence, 85% reduction in HIV testing on PrEP, 50% reduction in new ART initiations and 10% reduction in viral suppression (see Table 2 for age- and race-specific disruptions). Thick lines are median, boxes are interquartile range, and whiskers full range across all model fits.

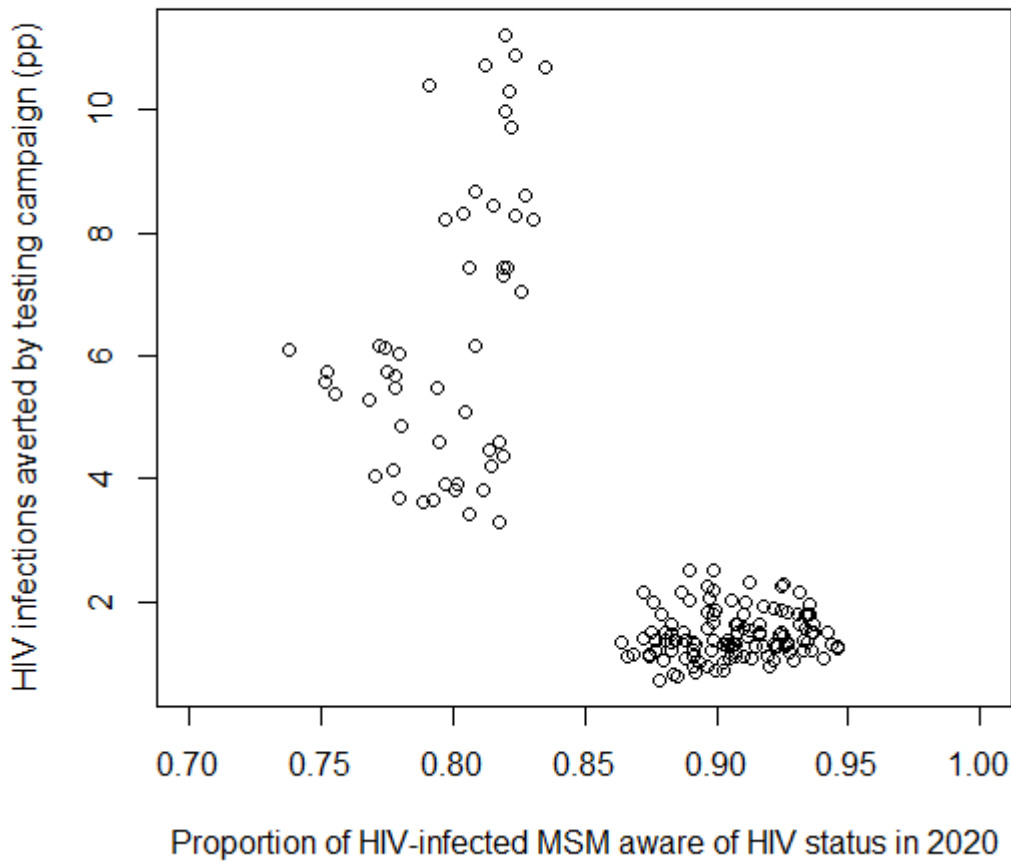

**Figure S15. Absolute impact of the HIV testing campaign on new HIV infections plotted against levels of awareness of HIV-positive status in 2020.** Data from Figure S14d (with 25% reduction in partnerships) are replotted against awareness levels. The absolute impact is the absolute difference between the impact of a scenario without an HIV testing campaign during the period of disruption and the impact of a scenario with the testing campaign, expressed as percentage points (c.f. Figure 4, S14b,d). Disruptions are assumed to last for 6 months and consist of: a 20% reduction in HIV tests, 5% reduction in condom use, 72% reduction in PrEP initiations, 9% reduction in PrEP adherence, 85% reduction in HIV testing on PrEP, 50% reduction in new ART initiations, 10% reduction in viral suppression and 25% reduction in partner numbers (see Table 2 for age- and race-specific disruptions). The HIV testing campaign reaches 90% of MSM for HIV testing during the six-month disruption. Impact is measured over 5 years. Points are from individual model fits.

## References

1. Mitchell KM, Hoots B, Dimitrov D, et al. Improvements in the HIV care continuum needed to meaningfully reduce HIV incidence among men who have sex with men in Baltimore, US: a modelling study for HPTN 078. *J Int AIDS Soc* 2019; **22**(3): e25246.
2. Press WH, Teukolsky SA, Vetterling WT, Flannery BP. Numerical Recipes: the Art of Scientific Computing (3rd Edition). New York: Cambridge University Press; 2007.
3. Salomon JA, Haagsma JA, Davis A, et al. Disability weights for the Global Burden of Disease 2013 study. *Lancet Glob Health* 2015; **3**(11): e712-23.
4. MacKellar DA, Gallagher KM, Finlayson T, Sanchez T, Lansky A, Sullivan PS. Surveillance of HIV risk and prevention behaviors of men who have sex with men--a national application of venue-based, time-space sampling. *Public Health Rep* 2007; **122 Suppl 1**: 39-47.
5. Wejnert C, Le B, Rose CE, et al. HIV Infection and Awareness among Men Who Have Sex with Men--20 Cities, United States, 2008 and 2011. *PLoS One* 2013; **8**(10): e76878.
6. Maulsby C, Sifakis F, German D, Flynn CP, Holtgrave D. Partner characteristics and undiagnosed HIV seropositivity among men who have sex with men only (MSMO) and men who have sex with men and women (MSMW) in Baltimore. *AIDS Behav* 2012; **16**(3): 543-53.
7. Liu AY, Cohen SE, Vittinghoff E, et al. Preexposure Prophylaxis for HIV Infection Integrated With Municipal- and Community-Based Sexual Health Services. *JAMA Intern Med* 2016; **176**(1): 75-84.
8. German D, Shearer K, Park JN, et al. Factors associated with misreporting HIV status among MSM from Baltimore [abstract 906]. CROI. Boston, USA; 2016.
9. Cohen SE, Vittinghoff E, Bacon O, et al. High interest in preexposure prophylaxis among men who have sex with men at risk for HIV infection: baseline data from the US PrEP demonstration project. *J Acquir Immune Defic Syndr* 2015; **68**(4): 439-48.
10. Hoots BE, Finlayson T, Nerlander L, Paz-Bailey G. Willingness to take, use of, and indications for pre-exposure prophylaxis among men who have sex with men-20 US cities, 2014. *Clin Infect Dis* 2016; **63**(5): 672-7.
11. Centers for Disease Control and Prevention. HIV Infection Risk, Prevention, and Testing Behaviors Among Men Who Have Sex With Men—National HIV Behavioral Surveillance, 23 U.S. Cities, 2017. *HIV Surveillance Special Report 8* 2019; **22**.
12. Purcell DW, Johnson CH, Lansky A, et al. Estimating the population size of men who have sex with men in the United States to obtain HIV and syphilis rates. *Open AIDS J* 2012; **6**: 98-107.
13. Easterbrook PJ, Chmiel JS, Hoover DR, et al. Racial and ethnic differences in human immunodeficiency virus type 1 (HIV-1) seroprevalence among homosexual and bisexual men. The Multicenter AIDS Cohort Study. *Am J Epidemiol* 1993; **138**(6): 415-29.
14. Sullivan PS, Salazar L, Buchbinder S, Sanchez TH. Estimating the proportion of HIV transmissions from main sex partners among men who have sex with men in five US cities. *AIDS* 2009; **23**(9): 1153-62.
15. Delaney KP, Rosenberg ES, Kramer MR, Waller LA, Sullivan PS. Optimizing human immunodeficiency virus testing interventions for men who have sex with men in the United States: a modeling study. *Open Forum Infect Dis* 2015; **2**(4): ofv153.
16. Mitchell JW, Petroll AE. Patterns of HIV and sexually transmitted infection testing among men who have sex with men couples in the United States. *Sex Transm Dis* 2012; **39**(11): 871-6.
17. Maulsby C, Jain K, Sifakis F, German D, Flynn CP, Holtgrave D. Individual-level and partner-level predictors of newly diagnosed HIV infection among black and white men who have sex with men in Baltimore, MD. *AIDS Behav* 2014.
18. Hollingsworth TD, Anderson RM, Fraser C. HIV-1 transmission, by stage of infection. *J Infect Dis* 2008; **198**(5): 687-93.
19. Boily MC, Baggaley RF, Wang L, et al. Heterosexual risk of HIV-1 infection per sexual act: systematic review and meta-analysis of observational studies. *Lancet Infect Dis* 2009; **9**(2): 118-29.
20. Dunn D, Woodburn P, Duong T, et al. Current CD4 cell count and the short-term risk of AIDS and death before the availability of effective antiretroviral therapy in HIV-infected children and adults. *J Infect Dis* 2008; **197**(3): 398-404.
21. Cori A, Pickles M, van Sighem A, et al. CD4+ cell dynamics in untreated HIV-1 infection: overall rates, and effects of age, viral load, sex and calendar time. *AIDS* 2015; **29**(18): 2435-46.
22. Egger M, May M, Chene G, et al. Prognosis of HIV-1-infected patients starting highly active antiretroviral therapy: a collaborative analysis of prospective studies. *Lancet* 2002; **360**(9327): 119-29.
23. UK Office for National Statistics. Deaths: age sex. England and Wales [table 6.1]. *Population Trends* 2006; **126**: 49.
24. Antiretroviral Therapy Cohort Collaboration. Importance of baseline prognostic factors with increasing time since initiation of highly active antiretroviral therapy: collaborative analysis of cohorts of HIV-1-infected patients. *J Acquir Immune Defic Syndr* 2007; **46**(5): 607-15.
25. Michigan Department of Community Health. Adult and Adolescent Spectrum of Disease Project in Michigan Summary Report 1990-2003.
26. Mellors JW, Munoz A, Giorgi JV, et al. Plasma viral load and CD4+ lymphocytes as prognostic markers of HIV-1 infection. *Ann Intern Med* 1997; **126**(12): 946-54.



27. Herbeck JT, Gottlieb GS, Li X, et al. Lack of evidence for changing virulence of HIV-1 in North America. *PLoS One* 2008; **3**(2): e1525.
28. Drake AL, Kinuthia J, Matemo D, et al. Virologic and immunologic response following antiretroviral therapy initiation among pregnant and postpartum women with acute HIV-1 infection [abstract #MOPDB0101]. International AIDS conference. Melbourne, Australia; 2014.
29. Donnell D, Baeten JM, Kiarie J, et al. Heterosexual HIV-1 transmission after initiation of antiretroviral therapy: a prospective cohort analysis. *Lancet* 2010; **375**(9731): 2092-8.
30. Hallett TB, Baeten JM, Heffron R, et al. Optimal uses of antiretrovirals for prevention in HIV-1 serodiscordant heterosexual couples in South Africa: a modelling study. *PLoS Med* 2011; **8**(11): e1001123.
31. Baggaley RF, White RG, Boily MC. HIV transmission risk through anal intercourse: systematic review, meta-analysis and implications for HIV prevention. *Int J Epidemiol* 2010; **39**(4): 1048-63.
32. Jin F, Jansson J, Law M, et al. Per-contact probability of HIV transmission in homosexual men in Sydney in the era of HAART. *AIDS* 2010; **24**(6): 907-13.
33. Blaser N, Wettstein C, Estill J, et al. Impact of viral load and the duration of primary infection on HIV transmission: systematic review and meta-analysis. *AIDS* 2014; **28**(7): 1021-9.
34. Anderson JE, Carey JW, Taveras S. HIV testing among the general US population and persons at increased risk: information from national surveys, 1987-1996. *Am J Public Health* 2000; **90**(7): 1089-95.
35. Moore RD, Keruly JC, Bartlett JG. Improvement in the health of HIV-infected persons in care: reducing disparities. *Clin Infect Dis* 2012; **55**(9): 1242-51.
36. Rebeiro P, Althoff KN, Buchacz K, et al. Retention among North American HIV-infected persons in clinical care, 2000-2008. *J Acquir Immune Defic Syndr* 2013; **62**(3): 356-62.
37. Tedaldi EM, Richardson JT, Debes R, et al. Retention in care within 1 year of initial HIV care visit in a multisite US cohort: who's in and who's out? *J Int Assoc Provid AIDS Care* 2014; **13**(3): 232-41.
38. Hoots BE, Finlayson TJ, Wejnert C, Paz-Bailey G. Early linkage to HIV care and antiretroviral treatment among men who have sex with men - 20 cities, United States, 2008 and 2011. *PLoS One* 2015; **10**(7): e0132962.
39. Center for HIV Surveillance Epidemiology and Evaluation Maryland Department of Health and Mental Hygiene. Baltimore City annual HIV epidemiological profile 2013. Baltimore, MD. , 2015.
40. Center for HIV Surveillance Epidemiology and Evaluation Maryland Department of Health and Mental Hygiene. 2012 Baltimore City annual HIV epidemiological profile. Baltimore, MD. , 2015.
41. Center for HIV Surveillance Epidemiology and Evaluation Maryland Department of Health and Mental Hygiene. Baltimore City annual HIV epidemiological profile 2015. 2016.
42. Singh S, Bradley H, Hu X, Skarbinski J, Hall HI, Lansky A. Men living with diagnosed HIV who have sex with men: progress along the continuum of HIV care--United States, 2010. *MMWR Morb Mortal Wkly Rep* 2014; **63**(38): 829-33.
43. Centers for disease control and prevention. Reported CD4+ T-lymphocyte results for adults and adolescents with HIV/AIDS - 33 states, 2005. *HIV/AIDS Surveillance Report* 2005; **11**(2).
44. Centers for Disease Control and Prevention. Reported CD4+ T-lymphocyte and viral load results for adults and adolescents with HIV infection - 37 states, 2005-2007. *HIV Surveillance Supplemental Report* 2010; **16**(1).
45. Althoff KN, Rebeiro P, Brooks JT, et al. Disparities in the quality of HIV care when using US Department of Health and Human Services indicators. *Clin Infect Dis* 2014; **58**(8): 1185-9.
46. Novak RM, Hart RL, Chmiel JS, Brooks JT, Buchacz K. Disparities in initiation of combination antiretroviral treatment and in virologic suppression among patients in the HIV Outpatient Study (HOPS), 2000-2013. *J Acquir Immune Defic Syndr* 2015.
47. Weintrob AC, Grandits GA, Agan BK, et al. Virologic response differences between African Americans and European Americans initiating highly active antiretroviral therapy with equal access to care. *J Acquir Immune Defic Syndr* 2009; **52**(5): 574-80.
48. Cohen MS, Chen YQ, McCauley M, et al. Antiretroviral therapy for the prevention of HIV-1 transmission. *N Engl J Med* 2016; **375**(9): 830-9.
49. Guiguet M, Porter K, Phillips A, Costagliola D, Babiker A. Clinical progression rates by CD4 cell category before and after the initiation of combination antiretroviral therapy (cART). *Open AIDS J* 2008; **2**: 3-9.
50. Mocroft A, Furrer HJ, Miro JM, et al. The incidence of AIDS-defining illnesses at a current CD4 count  $\geq$  200 cells/ $\mu$ L in the post-combination antiretroviral therapy era. *Clin Infect Dis* 2013; **57**(7): 1038-47.
51. Li X, Margolick JB, Conover CS, et al. Interruption and discontinuation of highly active antiretroviral therapy in the multicenter AIDS cohort study. *J Acquir Immune Defic Syndr* 2005; **38**(3): 320-8.
52. Howe CJ, Cole SR, Napravnik S, Eron JJ. Enrollment, retention, and visit attendance in the University of North Carolina Center for AIDS Research HIV clinical cohort, 2001-2007. *AIDS Res Hum Retroviruses* 2010; **26**(8): 875-81.
53. Krishnan S, Wu K, Smurzynski M, et al. Incidence rate of and factors associated with loss to follow-up in a longitudinal cohort of antiretroviral-treated HIV-infected persons: an AIDS Clinical Trials Group (ACTG) Longitudinal Linked Randomized Trials (ALLRT) analysis. *HIV Clin Trials* 2011; **12**(4): 190-200.
54. Dasgupta S, Oster AM, Li J, Hall HI. Disparities in consistent retention in HIV care - 11 states and the district of Columbia, 2011-2013. *MMWR Morb Mortal Wkly Rep* 2016; **65**(4): 77-82.
55. Robertson M, Laraque F, Mavronicolas H, Braunstein S, Torian L. Linkage and retention in care and the time to HIV viral suppression and viral rebound - New York City. *AIDS Care* 2015; **27**(2): 260-7.

56. Smith DK, Herbst JH, Zhang X, Rose CE. Condom effectiveness for HIV prevention by consistency of use among men who have sex with men in the United States. *J Acquir Immune Defic Syndr* 2015; **68**(3): 337-44.
57. Mills E, Cooper C, Anema A, Guyatt G. Male circumcision for the prevention of heterosexually acquired HIV infection: a meta-analysis of randomized trials involving 11,050 men. *HIV Med* 2008; **9**(6): 332-5.
58. Rodger AJ, Cambiano V, Bruun T, et al. Sexual activity without condoms and risk of HIV transmission in serodifferent couples when the HIV-positive partner is using suppressive antiretroviral therapy. *JAMA* 2016; **316**(2): 171-81.
59. Anderson PL, Glidden DV, Liu A, et al. Emtricitabine-tenofovir concentrations and pre-exposure prophylaxis efficacy in men who have sex with men. *Sci Transl Med* 2012; **4**(151): 151ra25.
60. Palella FJ, Jr., Delaney KM, Moorman AC, et al. Declining morbidity and mortality among patients with advanced human immunodeficiency virus infection. HIV Outpatient Study Investigators. *N Engl J Med* 1998; **338**(13): 853-60.
61. Hall HI, An Q, Tang T, et al. Prevalence of diagnosed and undiagnosed HIV infection - United States, 2008-2012. *MMWR Morb Mortal Wkly Rep* 2015; **64**(24): 657-62.
62. Hall HI, Frazier EL, Rhodes P, et al. Differences in human immunodeficiency virus care and treatment among subpopulations in the United States. *JAMA Intern Med* 2013; **173**(14): 1337-44.
63. Sanchez TH, Zlotorzynska M, Rai M, Baral SD. Characterizing the impact of COVID-19 on men who have sex with men across the United States in April, 2020. *AIDS Behav* 2020: 1-9.
64. Stephenson R, Chavanduka TMD, Rosso MT, et al. Sex in the time of COVID-19: Results of an online survey of gay, bisexual and other men who have sex with men's experience of sex and HIV prevention during the US COVID-19 epidemic. *AIDS Behav* 2020: 1-9.
65. Santos GM, Ackerman B, Rao A, et al. Economic, mental health, HIV prevention and HIV treatment impacts of COVID-19 and the COVID-19 response on a global sample of cisgender gay men and other men who have sex with men. *AIDS Behav* 2020: 1-11.
66. Krakower D, Solleveld P, Levine K, Mayer K. Impact of COVID-19 on HIV preexposure prophylaxis care at a Boston community health center [abstract number OACLB0104]. 23rd International AIDS conference. virtual; 2020.
67. Starks TJ, Jones SS, Sauermilch D, et al. Evaluating the impact of COVID-19: A cohort comparison study of drug use and risky sexual behavior among sexual minority men in the U.S.A. *Drug Alcohol Depend* 2020; **216**: 108260.
68. McKay T, Henne J, Gonzales G, Quarles R, Gavulic KA, Garcia Gallegos S. The COVID-19 Pandemic and Sexual Behavior among Gay and Bisexual Men in the United States. Available at SSRN: <https://ssrn.com/abstract=3614113> 2020.
